# The evolution of egg trading in simultaneous hermaphrodites

Jorge Peña<sup>1,\*,\dagger</sup>, Georg Nöldeke<sup>2,\ddagger</sup>, and Oscar Puebla<sup>3,4,5,\S</sup>

1. Institute for Advanced Study in Toulouse, University of Toulouse Capitole, Toulouse, France
2. Faculty of Business and Economics, University of Basel, Switzerland
3. GEOMAR Helmholtz Centre for Ocean Research Kiel, Kiel, Germany
4. University of Kiel, Faculty of Mathematics and Natural Sciences, Kiel, Germany
5. Smithsonian Tropical Research Institute, Panamá, República de Panamá

\* Corresponding author; e-mail: [jorge.pena@iast.fr](mailto:jorge.pena@iast.fr)

\dagger ORCID ID: [0000-0002-4137-1823](https://orcid.org/0000-0002-4137-1823)

\ddagger ORCID ID: [0000-0001-6651-9890](https://orcid.org/0000-0001-6651-9890)

\S ORCID ID: [0000-0001-9700-5841](https://orcid.org/0000-0001-9700-5841)

*Keywords:* Egg trading, simultaneous hermaphroditism, cooperation, direct reciprocity.

## Abstract

Egg trading, whereby simultaneous hermaphrodites exchange each other's eggs for fertilization, constitutes one of the few rigorously documented and most widely cited examples of direct reciprocity among unrelated individuals. Yet how egg trading may initially invade a population of non-trading simultaneous hermaphrodites is still unresolved. Here, we address this question with an analytical model that considers mate encounter rates and costs of egg production in a population that may include traders (who provide eggs for fertilization only if their partners also have eggs to reciprocate), providers (who provide eggs regardless of whether their partners have eggs to reciprocate), and withholders ("cheaters" who only mate in the male role and just use their eggs to elicit egg release from traders). Our results indicate that a combination of intermediate mate encounter rates, sufficiently high costs of egg production, and a sufficiently high probability that traders detect withholders (in which case eggs are not provided) is conducive to the evolution of egg trading. Under these conditions traders can invade—and resist invasion from—providers and withholders alike. The prediction that egg trading evolves only under these specific conditions is consistent with the rare occurrence of this mating system among simultaneous hermaphrodites.

## Introduction

18 Sexual conflict arises when there is a conflict of interest between the two members of a mating  
pair over sexual reproduction ([Hammerstein & Parker, 1987](#); [Kokko & Jennions, 2014](#)). In simul-  
taneous hermaphrodites such a conflict arises with respect to the male and female functions, and  
21 often manifests as a preference for mating in the male role ([Charnov, 1979](#)). Such preference  
has been interpreted as a direct consequence of anisogamy: since eggs are more energetically  
costly to produce than sperm, reproductive success is expected to be limited by access to eggs  
24 specifically ([Bateman \(1948\)](#), see also [Parker & Birkhead \(2013\)](#) for a more recent perspective).  
Mating in the male role should therefore be preferred, which creates a conflict of interest between  
mating partners: both would prefer to mate in the male role, but for the mating to be successful  
27 one partner needs to mate in the less preferred female role ([Leonard, 1993](#)).

Egg trading is a specific mating system whereby simultaneous hermaphrodites trade each  
other's eggs for fertilization, which contributes to resolve this type of conflict. Egg trading  
30 evolved independently in fishes ([Fischer, 1980, 1984](#); [Oliver, 1997](#); [Petersen, 1995](#); [Pressley, 1981](#))  
and polychaetes ([Picchi et al., 2018](#); [Sella, 1985](#); [Sella & Lorenzi, 2000](#); [Sella et al., 1997](#); [Sella &  
Ramella, 1999](#)). When mating, a pair of egg traders take turns in fertilizing each other's eggs.  
33 By linking male reproductive success to female reproductive success, egg trading disincentivizes  
spawning in the male role predominantly or exclusively, as opportunities to fertilize a partner's  
eggs depend on providing eggs to that partner ([Fischer, 1980](#)). More broadly, egg trading consti-  
36 tutes one of the few rigorously documented and most widely cited examples of direct reciprocity  
among unrelated individuals in animals ([Axelrod & Hamilton, 1981](#)). Direct reciprocity (also  
known as "reciprocal altruism"; [Trivers 1971](#)) operates when an individual acts at an immediate  
39 fitness cost to benefit another individual, who in turn reciprocates that benefit back. It provides a  
mechanism for the evolution of cooperation among genetically unrelated individuals ([Lehmann  
& Keller, 2006](#); [Nowak, 2006](#); [Sachs et al., 2004](#); [Van Cleve & Akçay, 2014](#)).

42 To date, most theoretical work on egg trading has sought to explain (i) its evolutionary stabil-

ity against invasion by “cheaters” (referred here as “withholders”) who fertilize their partners’ eggs but do not reciprocate by releasing eggs (Crowley & Hart, 2007; Friedman & Hammerstein, 1991; Leonard, 1990), and (ii) its role in making simultaneous hermaphroditism evolutionarily stable relative to gonochorism (Fischer, 1980; Henshaw et al., 2015). While these studies addressed the stability and evolutionary consequences of egg trading once it is already established, how egg trading may evolve in the first place turned out to be a problematic question. Axelrod & Hamilton (1981) speculated that egg trading might have evolved through a low-density phase that would have favored self-fertilization and inbreeding, which would have in turn allowed kin selection to operate. However, this hypothesis has been challenged on the grounds that many egg traders do not (and might not have the physiological ability to) self-fertilize (Fischer, 1981, 1988).

More recently, Henshaw et al. (2014) provided a combination of analytical and simulation models that constitutes the first thorough attempt to explicitly address the evolution of egg trading. Their analytical model considers mate encounters in a population that includes non-traders (individuals who provide eggs at every mating opportunity, referred here as “providers”) and traders (individuals who provide eggs only if their partner have eggs to reciprocate). Their results show that, as with other instances of direct reciprocity (André, 2014), egg trading is under positive frequency-dependent selection and counterselected unless the proportion of traders in the population reaches a critical threshold. Egg trading can therefore only reach fixation in this model when the strategy is already represented by a certain proportion of the population, leaving it open how rare egg-trading mutants may initially persist and spread. Henshaw et al. (2014) showed that the egg-trading invasion barrier is easier to overcome when encounters between mates are frequent, as such high encounter rates increase the chances that a rare egg trader will find a partner with eggs to reciprocate. This relationship between encounter rates and the evolution of egg trading raises an interesting dilemma since high encounter rates have also been found to destabilize egg trading by allowing withholders to invade a population of egg traders (Crowley & Hart, 2007). Consequently, it is neither clear how egg trading can initially spread

nor to what extent it can resist invasion by withholders under the high encounter rates that are thought to facilitate its establishment.

72 Here we build on the analytical model of [Henshaw et al. \(2014\)](#) and extend it by adding four  
fundamental features. First, we allow for the possible occurrence of withholders, i.e., “cheaters”  
who never provide eggs and only mate in the male role, in addition to traders and providers. Sec-  
75 ond, we relax the implicit assumption in [Henshaw et al. \(2014\)](#) that egg production has no costs  
in terms of availability for mating. This assumption does not generally hold in nature since the  
time and energy devoted to the acquisition of resources for egg production often trades off with  
78 the time and energy available for mate search ([Puurtinen & Kaitala, 2002](#)). A direct implication  
of this trade-off is that individuals who are in the process of producing new eggs are expected  
to be less available for matings (in the male role since they have no eggs) than individuals car-  
81 rying eggs. Third, we assume that traders can detect withholders with some positive probability  
and “punish” them by not providing eggs. Fourth, we incorporate the biologically important  
feature, discussed by [Henshaw et al. \(2014\)](#) but not incorporated in their model, that eggs might  
84 senesce and become unviable before a partner is found. We show that the first three additions  
generate complex evolutionary dynamics that allow traders to invade (and resist invasion from)  
both providers and withholders when encounter rates are intermediate and both the costs of egg  
87 production and the probability that withholders can be detected are sufficiently high. The fourth  
addition (egg senescence) shapes the trade-offs that affect the evolution of egg trading.

## Model

90 We posit a large, well-mixed population of simultaneous hermaphrodites in which generations  
overlap and there is no self-fertilization. At any given time, each individual in the population  
is either carrying a batch of eggs or not. Eggless individuals produce a new batch of eggs  
93 at a normalized rate of 1. Egg-carrying individuals encounter potential mates at the positive  
encounter rate  $m$ , while eggless individuals (who are producing new eggs) encounter potential

mates at a discounted rate  $\lambda m$ , where  $0 < \lambda \leq 1$ . The parameter  $\lambda$  measures the degree to which  
96 individuals who are in the process of producing eggs are available for mating. Being unavailable  
for mating constitutes a cost of egg production in terms of missed opportunities for reproduction  
in the male role. Thus, low values of mating availability  $\lambda$  imply a high cost of egg production,  
99 with the extreme case  $\lambda = 0$  implying maximal costs (mating in the male role is impossible while  
producing eggs). Conversely, high mating availability  $\lambda$  implies a low cost of egg production,  
with  $\lambda = 1$  implying minimal cost (individuals who are in the process of producing new eggs  
102 can always mate in the male role). We also incorporate egg senescence, with eggs becoming  
non-viable at a rate  $\rho \geq 0$ .

We consider three different mating strategies: T (“trading”), H (“withholding”), and P (“pro-  
105 viding”). All three strategies mate in the male role (i.e., fertilize eggs) whenever possible, but  
differ on the conditions under which they provide eggs to partners for fertilization. Traders are  
choosy: they only provide eggs if mates have eggs to reciprocate. Withholders are stingy: they  
108 never provide eggs, and only reproduce through their male function. Indeed, the only function  
of their eggs is to elicit egg release from traders, i.e., withholders “cheat” on their partners by  
failing to reciprocate eggs. Providers are generous: they provide eggs to any partner, regardless  
111 of whether the mate has eggs to reciprocate. We further assume that traders can detect with-  
holders with a positive probability  $q$ , in which case eggs are not provided. In the absence of  
withholders (there are only providers and traders in the population) and after setting  $\lambda = 1$  (egg  
114 production is costless in terms of availability for mating), and  $\rho = 0$  (eggs do not senesce), our  
model recovers the analytical model of [Henshaw et al. \(2014\)](#), after identifying our “providers”  
with their “non-traders”.

117 In line with game-theoretic approaches ([Maynard Smith, 1982](#)), we assume a one-locus hap-  
loid genetic system, so that each individual’s mating strategy is determined by a single gene  
inherited from the mother or the father with equal probability. Moreover, we assume a separa-  
120 tion of time scales such that the demographic variables (the proportions of individuals carrying  
and not carrying eggs within each strategy) equilibrate much faster than the evolutionary vari-

ables (the proportions of individuals following each strategy). With these assumptions, we can  
123 write the evolutionary dynamics of our model as a system of replicator equations (Hofbauer &  
Sigmund, 1998; Weibull, 1995) for the three strategies T, H, and P, with frequencies respectively  
given by  $x$ ,  $y$ , and  $z$ . That is, we write the evolutionary dynamics of our model as

$$\dot{x} = x(w_T - \bar{w}), \quad (1a)$$

$$\dot{y} = y(w_H - \bar{w}), \quad (1b)$$

$$\dot{z} = z(w_P - \bar{w}), \quad (1c)$$

126 where dots denote time derivatives,  $w_T$ ,  $w_H$ , and  $w_P$  are the fitnesses to each strategy, and  $\bar{w} =$   
 $xw_T + yw_H + zw_P$  is the average fitness in the population. Fitnesses are given by the rate of  
offspring production in both the male and the female roles, and are non-trivial functions of the  
129 parameters of the model and of the proportions of the different strategies when carrying and not  
carrying eggs at the demographic equilibrium. The state space  $\Delta$  is the simplex of all  $(x, y, z)$   
with  $x, y, z \geq 0$  and  $x + y + z = 1$ .

132 In the following we present a summary of our results. Our formal model and the analytical  
derivation of all results are given in [Appendix A: Detailed Model Description](#) and [Appendix B:](#)  
[Analysis of the Evolutionary Dynamics](#).

## 135 Results

The replicator dynamics has three monomorphic equilibria: a homogeneous population of traders  
(T), a homogeneous population of withholders (H), and a homogeneous population of providers  
138 (P). Among these equilibria, H is always unstable: for any parameter combination a homoge-  
neous population of withholders can be invaded by traders, providers, or a mixture of both  
strategies. In addition to these three monomorphic equilibria, and depending on parameter  
141 values, the replicator dynamics can have up to two out of three polymorphic equilibria on the  
boundary of the simplex  $\Delta$  (fig. 1): (i) an equilibrium R along the TP-edge, where traders and

providers coexist but withholders are absent (figs. 1B, 1C), (ii) an equilibrium Q along the TH-  
144 edge, where traders and withholders coexist but there are no providers (figs. 1C, 1D), and (iii)  
an equilibrium S along the HP-edge, where withholders and providers coexist but where there  
are no traders (figs. 1D, 1E). When these polymorphic equilibria exist, R is a saddle (repelling  
147 for points along the TP-edge, and attracting for neighboring points in the interior of  $\Delta$ ), Q is  
stable (attracting from neighboring points in  $\Delta$ ), and S is a saddle (attracting for points along the  
HP-edge, and repelling for neighboring points in the interior of  $\Delta$ ). These equilibria are rather  
150 complicated functions of the model parameters, so we report their expressions in [Appendix B:  
Analysis of the Evolutionary Dynamics](#). The replicator dynamics has no equilibria in the interior  
of  $\Delta$ , i.e., no population composition with all three strategies coexisting is an equilibrium.

153 We find that both the stability of the monomorphic equilibria T and P, and the existence of  
the polymorphic equilibria Q, R, and S, depend on how the mating availability  $\lambda$  compares to  
the critical value

$$\lambda_* = \frac{m - (1 + \rho)}{\rho(1 + \rho) + m(2 + \rho)}, \quad (2)$$

156 and on how the encounter rate  $m$  compares to the critical values

$$m_* = (1 + \rho) [1 + \lambda(1 + 2\rho)], \quad (3)$$

and

$$m^* = \frac{(1 + \rho)(1 + q) [1 - q + \lambda(1 + q + 2\rho)]}{(1 - q)^2}. \quad (4)$$

First, the stability of the monomorphic equilibrium P depends on how the mating availability  
159  $\lambda$  compares to the critical value  $\lambda_*$ . A homogeneous population of providers is stable against  
invasions by the other two strategies if and only if mating availability is high ( $\lambda > \lambda_*$ ). As  $\lambda$   
decreases and crosses the threshold  $\lambda_*$ , P becomes unstable against both traders and withholders,  
162 and the saddle S is created along the HP-edge.

Second, the stability of the monomorphic equilibrium T depends on how the encounter rate  $m$   
compares to the critical values  $m_*$  and  $m^*$ . A homogeneous population of traders is: (i) unstable



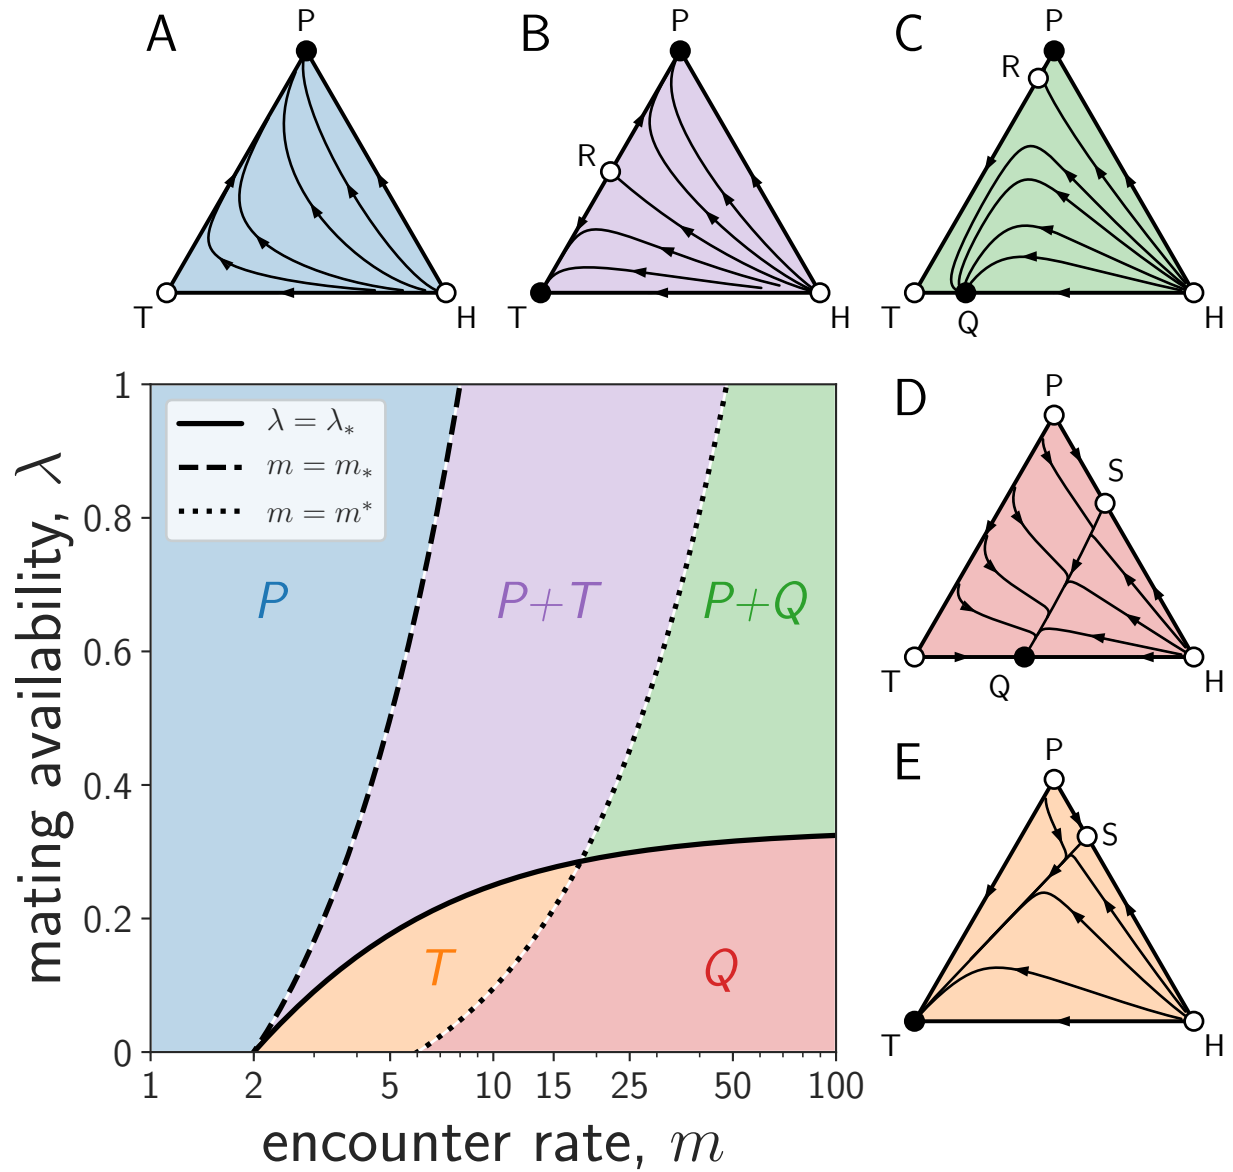

Figure 1: (Caption on the following page)

Figure 1: Effects of mating availability and encounter rates on the evolutionary dynamics of egg trading. The parameter space can be divided into five disjoint regions ( $P$ ,  $P+T$ ,  $P+Q$ ,  $Q$ , and  $T$ ) depending on how availability  $\lambda$  compares to the critical availability  $\lambda_*$  (equation (2)) and on how the encounter rate  $m$  compares to the critical encounter rates  $m_*$  (equation (3)) and  $m^*$  (equation (4)). The triangles  $\Delta$  represent the state space  $\Delta = \{(x, y, z) \geq 0, x + y + z = 1\}$ , where  $x$ ,  $y$ , and  $z$  are the frequencies of traders, withholders, and providers, respectively. The three vertices T, H, and P correspond to homogeneous states where the population is entirely comprised of traders ( $x = 1$ ), withholders ( $y = 1$ ), or providers ( $z = 1$ ). Full circles represent stable equilibria (sinks); empty circles represent unstable equilibria (sources or saddle points). (A) In region  $P$  trajectories in  $\Delta$  converge to P. (B) In region  $P+T$  trajectories converge to either P or T, depending on initial conditions. The equilibrium R on the TP-edge is a saddle point dividing the basins of attraction of P and T. (C) In region  $P+Q$  trajectories converge to either P or the equilibrium Q along the TH-edge, depending on initial conditions. (D) In region  $Q$  trajectories converge to Q. The equilibrium S along the HP-edge is a saddle. (E) In region  $T$  trajectories converge to T. Parameters:  $\rho = 1$ ,  $q = 0.5$ ,  $m = 2$  (A), 12 (B), 50 (C and D) or 8 (E), and  $\lambda = 0.7$  (A, B, and C), or 0.1 (D and E).

---

165 against invasion by providers but stable against invasion by withholders if the encounter rate  
is low ( $m < m_*$ ), (ii) stable against both withholders and providers if the encounter rate is  
intermediate ( $m_* < m < m^*$ ), and (iii) stable against invasion by providers but unstable against  
168 invasion by withholders if the encounter rate is high ( $m > m^*$ ). As  $m$  increases and crosses the  
threshold  $m_*$ , T becomes stable while spawning the unstable equilibrium R along the TP-edge; as  
 $m$  increases further and crosses the threshold  $m^*$ , T becomes unstable and the stable equilibrium  
171 Q (where traders and withholders coexist) is created along the TH-edge.

All in all, the parameter space can be partitioned into five dynamical regions (fig. 1), each  
having qualitatively different evolutionary dynamics. Among these, only regions Q and T (for  
174 which availability is low, i.e.,  $\lambda < \lambda^*$  holds) allow traders to invade a resident population of

providers, and only region  $T$  allows traders to both invade providers and resist invasion by withholders. A key requirement for this last scenario is that encounter rates are neither too high  
177 nor too low ( $m_* < m < m^*$ ).

The encounter rate  $m$  is a key parameter in our model. For low encounter rates ( $m < m_*$ ; region  $P$ ),  $P$  is the only stable equilibrium and the outcome of the evolutionary dynamics. This  
180 makes intuitive sense: if potential mates are difficult to find, individuals should provide eggs at every mating opportunity; being picky in this context is risky as another partner might be difficult to find before eggs become unviable. For higher encounter rates ( $m > m_*$ ; regions  $P+T$ ,  
183  $T$ ,  $P+Q$ , and  $Q$ ) finding mates becomes easier, and it pays to reject eggless partners in the hope of finding partners carrying eggs. Very large encounter rates ( $m > m^*$ ; regions  $P+Q$  and  $Q$ ) even allow withholders (who never release their eggs and only mate in the male role) to be successful  
186 in the long run and coexist with traders at the equilibrium  $Q$ . The proportion of traders at such an equilibrium decreases as the mate encounter rate increases, down to 50% in the limit of high encounter rates.

The benefits of being choosy are particularly salient when the costs of egg production are  
189 high (i.e., when the mating availability  $\lambda$  is low). Indeed, a lower mating availability  $\lambda$  has two related and reinforcing consequences. First, low availability means fewer opportunities to  
192 mate in the male role when not carrying eggs, and hence higher opportunity costs to mate indiscriminately in the female role. Second, low availability also implies that the probability of finding another potential mate without eggs after having rejected previous potential partners  
195 is lower, thus decreasing the risk of being choosy. In line with these arguments, we find that for sufficiently high costs of egg production ( $\lambda < \lambda_*$ ; regions  $Q$  and  $T$ ),  $P$  can be invaded by strategies that do not mate indiscriminately in the female role (traders and withholders). For high  
198 encounter rates ( $m > m^*$ ; region  $Q$ ) traders invade but are not able to displace withholders, and the population composition at equilibrium is a mixture of traders and withholders. Otherwise, for moderate encounter rates ( $m_* < m < m^*$ ; region  $T$ ) traders invade and take over the whole  
201 population while resisting invasion by withholders.

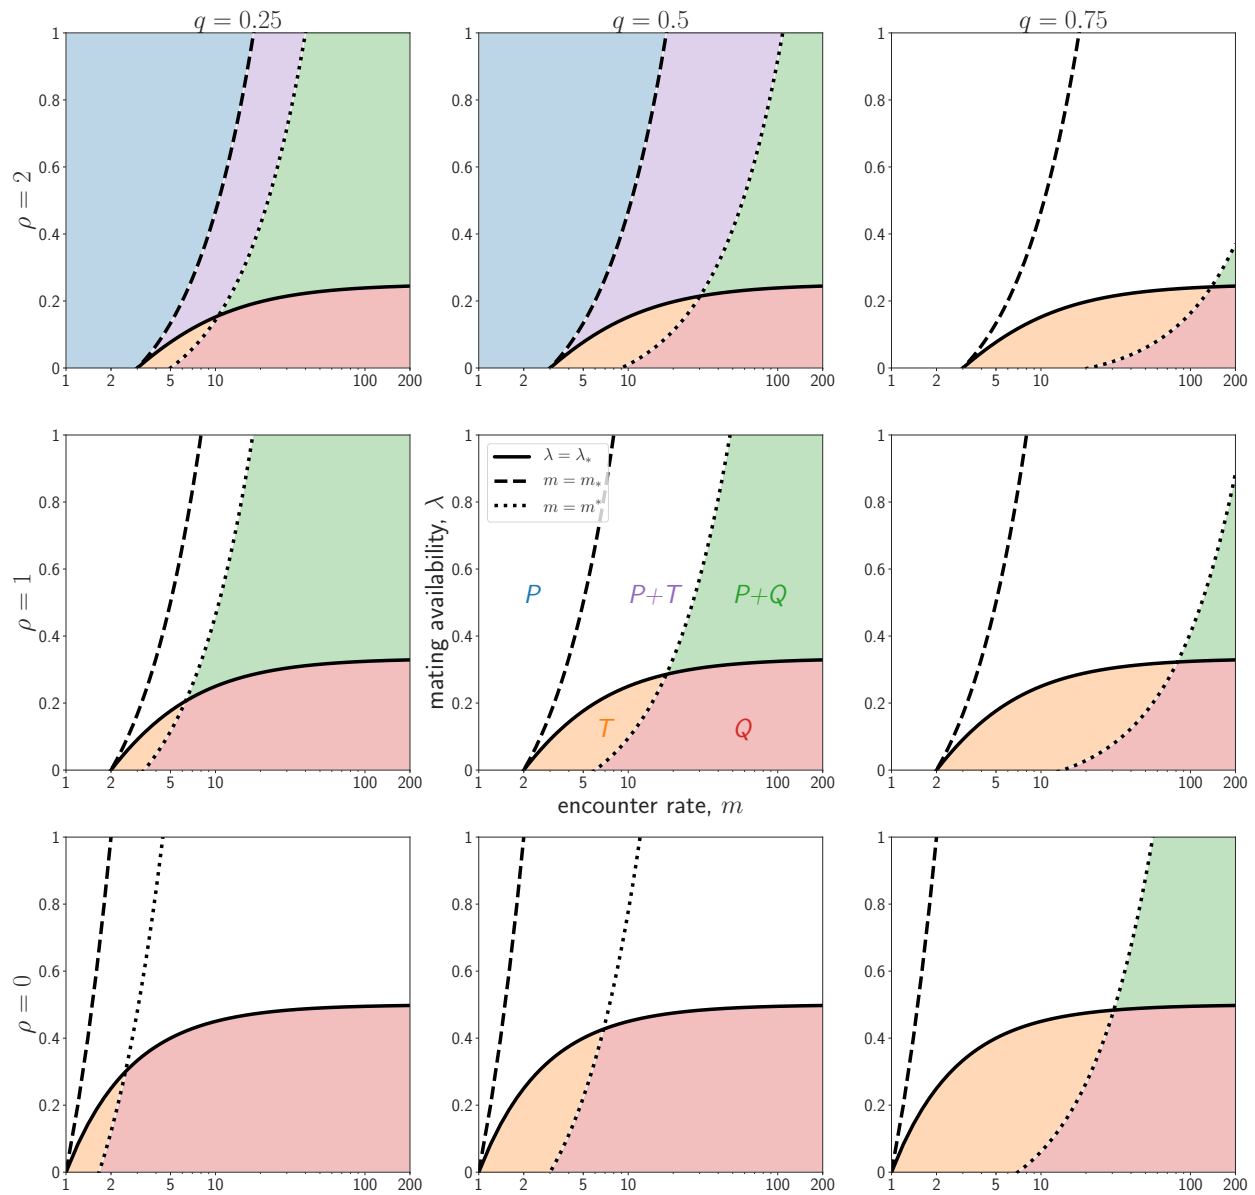

Figure 2: (Caption on the following page)

Figure 2: Effects of egg senescence and probability of withholder detection on the evolutionary dynamics of egg trading. Panels represent, for different combinations of egg senescence  $\rho$  and probability of withholder detection  $q$ , the critical mating availability  $\lambda_*$  (equation (2)), and the critical encounter rates  $m_*$  (equation (3)) and  $m^*$  (equation (4)) that define the boundaries of the five dynamical regions ( $P$ ,  $P+T$ ,  $P+Q$ ,  $Q$ , and  $T$ ) into which the parameter space can be divided. For fixed  $\rho$  and  $\lambda$ , increasing  $q$  increases the values of the encounter rate  $m$  at which  $m = m^*$  holds, thus increasing the areas of regions  $P+T$  and  $T$  (where the trading equilibrium  $T$  is evolutionarily stable) and shrinking the areas of regions  $P+Q$  and  $Q$  (where withholders invade  $T$ ). For fixed  $q$  and  $m$ , increasing  $\rho$  decreases the values of the mating availability  $\lambda$  at which  $\lambda = \lambda_*$  holds, thus decreasing the combined area of regions  $Q$  and  $T$ , where traders can invade the providing equilibrium  $P$ . The middle panel (second row, second column) corresponds to the parameter values ( $\rho = 1$ ,  $q = 0.5$ ) used in fig. 1.

---

The probability that traders detect withholders,  $q$ , plays an essential role in stabilizing the trading equilibrium  $T$  in our model (fig. 2). Indeed, some amount of withholder detection  
204 (as encapsulated by the parameter  $q$ ) is necessary for trading to be evolutionarily stable in the presence of withholders. This is so because the critical encounter rate  $m^*$  tends to  $m_*$  (which does not depend on  $q$ ) as  $q$  tends to zero. Thus, in this limit, regions  $P+T$  and  $T$  cease to exist and the  
207 trading equilibrium  $T$  is unstable for all encounter rates. In addition, the critical encounter rate  $m^*$  is an increasing function of  $q$  (fig. 2). As  $m \leq m^*$  is a necessary and sufficient condition for a monomorphic population of traders to resist invasion by withholders, larger values of  $q$  imply  
210 that more stringent conditions (i.e., higher encounter rates) are required to destabilize  $T$ .

Finally, we note that the critical mating availability  $\lambda_*$  and the critical encounter rates  $m_*$  and  $m^*$  are all functions of the rate of egg senescence  $\rho$ . The critical availability  $\lambda_*$  is decreasing  
213 in  $\rho$  (fig. 2). The evolutionary consequence of this effect is that the higher the rate of egg senescence  $\rho$ , the lower the critical availability  $\lambda_*$  below which traders (and withholders) can

invade a monomorphic population of providers. This makes intuitive sense as providers give  
216 up their eggs more freely and are thus less likely to suffer the consequences of a higher egg  
senescence than traders and withholders. Additionally, both critical encounter rates  $m_*$  and  $m^*$   
are increasing in  $\rho$  (fig. 2). Therefore, the higher  $\rho$ , the higher the minimal encounter rate  $m_*$   
219 (respectively, the maximal encounter rate  $m^*$ ) required for a monomorphic population of traders  
to resist invasion by providers (respectively, by withholders).

## Discussion

222 A general prediction of our model is that there are only three possible evolutionarily stable  
equilibria: a homogeneous population of providers, a homogeneous population of egg traders,  
or a polymorphic population that includes both egg traders and withholders. The first stable  
225 equilibrium would correspond to simultaneous hermaphrodites that do not trade eggs. This  
equilibrium is attained in a large area of the parameter space, which is consistent with the fact  
that the majority of simultaneous hermaphrodites do not trade eggs. The second stable equilib-  
228 rium would correspond to egg traders and can be attained under the specific conditions that we  
discuss below. The closest situation to the third stable equilibrium in nature would correspond  
to egg-trading species in which mating also occurs in the male role only through streaking, i.e.,  
231 the furtive release of sperm in competition with the male of an egg trading pair (Fischer, 1984;  
Oliver, 1997; Petersen, 1995; Pressley, 1981). Streaking was not explicitly incorporated in our  
model but we note that, as our withholders, such streakers are not pure males but simultaneous  
234 hermaphrodites that mate in the male role. We are not aware of simultaneously hermaphroditic  
species in which egg trading is facultative, which is consistent with the fact that there is no stable  
equilibrium in our model involving both traders and providers.

237 When mating availability ( $\lambda$ ) is equal to one and egg senescence ( $\rho$ ) is equal to zero, the  
only difference between our model and the one in Henshaw et al. (2014) is that we incorporate  
withholders. Doing so does not affect the conclusion from Henshaw et al. (2014) that there is an

240 initial barrier that traders need to overcome in order to invade a population of providers. Further,  
as predicted by [Henshaw et al. \(2014\)](#), higher encounter rates make this invasion barrier smaller  
and in this sense high encounter rates thus promote the evolution of egg trading. However,  
243 very high encounter rates ( $m > m^*$ ) will also inevitably allow withholders to invade the trading  
equilibrium and thereby lead to the emergence of a stable mixture of traders and withholders.  
In particular, in the limit of very high encounter rates (so that the invasion barrier becomes  
246 arbitrarily small) the evolutionary outcome is not the invasion and fixation of trading predicted  
by [Henshaw et al. \(2014\)](#), but a stable mix consisting of 50% traders and 50% withholders. Such a  
mix is stable because with very high encounter rates withholders prosper in a population where  
249 there are ample opportunities to reproduce in the male role (as will be the case if traders, who  
are willing to provide their eggs with probability  $1 - q$ , are frequent) while they fare poorly  
in a population with few opportunities to reproduce in the male role (as will be the case in a  
252 population consisting predominantly of withholders who never provide their eggs).

Recognizing the possibility of costly egg production by allowing mating availability to be  
less than one is another important way in which our model differs from [Henshaw et al. \(2014\)](#).  
255 Indeed, our analysis reveals that the cost of egg production plays a crucial role in the evolution  
of egg trading. In particular, for encounter rates that are neither too high nor too low, traders can  
both (i) invade providers at sufficiently high encounter rates, and (ii) be stable against invasion by  
258 withholders at sufficiently small encounter rates. This result implies that neither a combination of  
self-fertilization and kin selection ([Axelrod & Hamilton, 1981](#)) nor high encounter rates ([Henshaw  
et al., 2014](#)) that would promote the invasion by withholders are necessary for the evolution of  
261 egg trading, and thereby resolves the dilemma on the relationship between encounter rate and  
the evolution of egg trading.

The trade-off between the time and energy allocated to acquire resources for egg production  
264 versus mate search that is captured by our parameter  $\lambda$  has been documented in egg traders.  
For example, in the hamlets (*Hypoplectrus* spp.), one of the fish groups in which egg trading is  
best described, individuals meet on a daily basis in a specific area of the reef for spawning at

267 dusk (Fischer, 1980). This can imply swimming over hundreds of meters of reef (Puebla et al.,  
2012). Not all individuals show up in the spawning area on each evening, but most individuals  
that are present are observed spawning in both the female and male role (implying that they  
270 carry eggs). The majority of individuals who do not spawn are not present in the spawning area  
and are therefore not available for mating, even in the male role only, which is exactly what the  
parameter  $\lambda$  captures. This said, our model is not meant to represent any group of egg traders in  
273 particular but to capture the minimal set of parameters that are relevant for the evolution of egg  
trading. Mate encounter rate had been identified as such a parameter by Henshaw et al. (2014);  
we added here the opportunity costs of egg production. Our results indicate that the evolution  
276 of egg trading from an ancestral state where the population consists only of providers requires  
at the very least a minimum of egg-production costs.

Once egg trading is able to invade a population of providers, two different evolutionary  
279 scenarios are possible. First, trading can reach fixation and be established at an evolutionarily  
stable equilibrium. Second, trading can be sustained at a polymorphic equilibrium featuring egg  
traders and withholders. Which of these two scenarios is reached depends to a large extent on  
282 the ability of egg traders to detect withholders ( $q$ ). A necessary condition for the first scenario to  
be reached is that  $q$  is positive, i.e., that there is at least some withholder detection. Moreover, the  
higher  $q$  (i.e., the better the abilities of traders to detect withholders), the larger the set of values  
285 for the other parameters under which trading is evolutionarily stable against withholding and  
the first scenario prevails.

There are at least two ways in which egg traders may be able to detect withholders in nature.  
288 The first one is through reputation and learning in small populations where mating encoun-  
ters occur repeatedly among the same set of individuals (Puebla et al., 2012). In this situation,  
individuals who fail to reciprocate eggs might be identified as withholders and avoided in sub-  
291 sequent mating encounters. The second one is through parcelling of the egg clutch, which occurs  
in several egg-trading species (Fischer, 1980; Fischer & Hardison, 1987; Oliver, 1997; Petersen,  
1995). In this case eggs are divided into parcels that the two partners take turns in providing



294 and fertilizing. This constitutes an efficient mechanism to detect partners that fail to reciprocate,  
and also provides the opportunity to terminate the interaction before all eggs are released if the  
partner does not reciprocate.

297 By and large, the conditions that are required for the invasion and fixation of egg trading  
(intermediate encounter rates, sufficiently high costs of egg production and possibility to detect  
withholders) are rather restrictive. In addition, egg trading requires that individuals interact  
300 directly to trade eggs, which implies that they are mobile. It is therefore not surprising that  
egg trading is a rare mating system, documented only in Serraninae fishes ([Fischer, 1980, 1984](#);  
[Oliver, 1997](#); [Petersen, 1995](#); [Pressley, 1981](#)) and dorvilleid polychaetes in the genus *Ophryotrocha*  
303 ([Sella, 1985](#); [Sella & Lorenzi, 2000](#); [Sella et al., 1997](#); [Sella & Ramella, 1999](#)). Hermaphroditism,  
on the other hand, occurs in 24 out of 34 animal phyla and is common to dominant in 14 phyla  
including sponges, corals, jellyfishes, flatworms, mollusks, ascidians and annelids ([Jarne & Auld,](#)  
306 [2006](#)). The rare occurrence of egg trading among simultaneous hermaphrodites suggests that  
simultaneous hermaphroditism can readily evolve and be maintained in the absence of egg  
trading. This is what motivated our choice to focus on the evolution of egg trading among  
309 simultaneous hermaphrodites as opposed to the joint evolution of egg trading and simultaneous  
hermaphroditism. In our model this is illustrated by the fact that although withholders mate  
in the male role exclusively, they are nonetheless not pure males but hermaphrodites that keep  
312 producing eggs to elicit egg release by traders. In principle, the rarity of egg trading might  
also be due to the possibility that egg trading ultimately leads to a loss of hermaphroditism and  
consequently of egg trading itself. However, this scenario goes against the results of [Henshaw](#)  
315 [et al. \(2015\)](#), who show that egg trading can help stabilizing hermaphroditism by selecting for  
a female-biased sex allocation in traders, which in turn prevents pure females from invading a  
population of traders.

318 We assumed a very simple genetic architecture of the trait under consideration, namely a one-  
locus haploid genetic system. Since most simultaneously hermaphroditic species are diploid, and  
since egg trading is likely to be a complex trait under the control of many genes, this is clearly a

321 simplifying assumption that trades biological reality for model tractability, i.e., an example of the  
“phenotypic gambit” often endorsed in evolutionary models ([Gardner et al., 2011](#); [Grafen, 1984](#)).  
In our case, this simplifying assumption is justified both by the fact that the specific genetic ar-  
324 chitecture of egg trading is so far unknown for any species, and by our goal of comparing our  
model and results with the existing literature, which has also explicitly or implicitly endorsed  
the phenotypic gambit. This said, egg trading and other traits affecting mating strategies are par-  
327 ticular because they influence who mates with whom and can thus potentially lead to assortment  
of alleles at the zygotic level. Additional work is needed to investigate the effect of the genetic  
system (e.g., number of loci, dominance) on the evolutionary dynamics of egg trading.

330 A key dynamic that is characteristic of systems subject to sexual conflict over mating such  
as the one investigated here is the co-evolution of male coercion and female resistance ([Clutton-  
Brock & Parker, 1995](#)). While male coercion has been considered in the context of egg trading  
333 ([Fischer & Hardison, 1987](#)), there is little evidence of this phenomenon among egg traders. Nev-  
ertheless, the streaking behavior displayed by some egg trading species ([Fischer, 1984](#); [Oliver,  
1997](#); [Petersen, 1995](#); [Pressley, 1981](#)) may be interpreted as a form of male coercion. [Henshaw  
et al. \(2014\)](#) included streaking in their simulation model and found that it makes the evolution  
336 of egg trading less likely (see also [Henshaw et al. \(2015\)](#) for the effects of streaking on the role  
played by egg trading in stabilizing hermaphroditism). This is because streakers (as our with-  
339 holders) bypass the trading convention and gain reproductive success as males without offering  
eggs in return. This form of male coercion could be counteracted by strategies of female resis-  
tance that increase the costs of coercion, such as the parcelling of the egg clutch observed in  
342 some egg traders ([Fischer, 1980](#); [Fischer & Hardison, 1987](#); [Oliver, 1997](#); [Petersen, 1995](#)). This  
calls for the incorporation of both streaking and egg parcelling in future analytical models to  
better understand the evolution of egg trading.

345 We modeled social interactions as a game with three distinct strategies (traders, providers,  
and withholders) and analyzed the resulting evolutionary dynamics using the replicator dynam-  
ics. An alternative model could consider a continuous strategy space and apply the theoretical

348 framework of adaptive dynamics (Dercole & Rinaldi, 2008; Doebeli, 2011; Geritz et al., 1998) to  
study the evolutionary dynamics of egg trading. While we expect our results to be robust to such  
a change in modelling framework, an adaptive dynamics treatment would allow for investigating  
351 the evolution of optimal rates of providing, withholding, and trading eggs, and for studying the  
concurrent evolution of punishment (which was treated as an exogenous variable in our model,  
via our parameter  $q$ ) in a relatively economic way.

354 Our specific model of egg trading shares features with more general models for the evolution  
of cooperation, in particular with models of partner choice (Bull & Rice, 1991; Noë & Hammer-  
stein, 1994) and indirect reciprocity (Nowak & Sigmund, 2005). First, our model is related to  
357 models of partner choice where potential partners are encountered at a certain rate, and where  
strategies or individuals can vary both in their “choosiness” and in their “cooperativeness” (e.g.,  
André & Baumard (2011); McNamara et al. (2008)). Importantly, however, in our model indi-  
360 viduals discriminate partners not directly on the basis of their perceived cooperativeness, but  
rather on their state or physiological condition (i.e., on whether or not the partner is carrying  
eggs), which serves as an indirect measure of partner quality. Second, the transitions a given  
363 focal individual makes between different states or physiological conditions are mediated by so-  
cial actions, e.g., an egg carrier becomes eggless when it decides to offer its eggs to a partner.  
This resembles the way models of indirect reciprocity work, where an individual’s reputation  
366 changes depending on both its decision to cooperate and the particular social norms to assign  
reputations enforced in the population (e.g., Leimar & Hammerstein (2001); Nowak & Sigmund  
(1998); Ohtsuki & Iwasa (2006); Panchanathan & Boyd (2003); Santos et al. (2018)). However, and  
369 in contrast to most theoretical models of indirect reciprocity, in our model individuals can opt out  
of social interactions (e.g., when traders refuse to mate with an eggless partner). Implementing  
similar features in models of social evolution would provide a good starting point for exploring  
372 mechanisms for the evolution of cooperation that apply to more general scenarios than the ones  
studied in this paper.

To summarize, our model suggests that egg trading should generally occur in simultaneously

375 hermaphroditic species for which encounter rates are intermediate, egg production entails a cost  
in terms of mating availability, and withholders can be detected to some extent. The estimation  
of these factors (as well as rates of egg senescence) in egg-trading and closely related non-egg-  
378 trading species would allow to test this prediction. The incorporation of egg parcelling and  
sperm competition through streaking into our model would also allow to refine our predictions.

## Acknowledgments

381 This research was funded by a Future Ocean Cluster of Excellence grant to O. Puebla. J. Peña  
also gratefully acknowledges financial support from the ANR-Labex IAST. The code used for  
creating the figures of this paper builds on Inom Mirzaev and Drew F. K. Williamson's Python  
384 package egtplot (<https://github.com/mirzaevinom/egtplot>). Our source code in Python is  
publicly available on GitHub (<https://github.com/jorgeapenas/eggtrading>).

## Appendix A: Detailed Model Description

387 Our model builds on the analytical model of [Henshaw et al. \(2014\)](#), extending it in a number of directions.

We posit a large, well-mixed population of simultaneous hermaphrodites. At any time, each individual in the population either is or is not carrying a batch of eggs. Individuals without eggs produce a new batch of eggs at a rate normalized to 1, so that all other rates are measured relative to the rate of egg production. Potential mates are encountered at rate  $m > 0$  if the focal individual carries eggs, or at a discounted rate  $\lambda m$ , where  $0 < \lambda \leq 1$ , if the focal does not carry eggs. Equivalently, an individual not carrying eggs is available for encounters with probability  $\lambda$ . Hence,  $\lambda$  captures the opportunity costs of egg production;  $\lambda < 1$  means that an individual busy producing eggs cannot be available all the time as a potential partner in the male role. We assume that eggs senesce and become unviable at rate  $\rho \geq 0$ .

Individuals adopt one of three possible strategies: trading (T), withholding (H), or providing (P). Our traders behave like the traders in [Henshaw et al. \(2014\)](#): they offer their eggs only to partners carrying eggs (who can reciprocate). Withholders produce and carry eggs but never release them to partners, thereby only reproducing through the male role. Providers correspond to the “non-traders” in [Henshaw et al. \(2014\)](#): they offer their eggs to any partner (either carrying or not carrying eggs). All three strategies fertilize the eggs offered to them by partners. Finally, we assume that traders can detect withholders with probability  $0 < q < 1$  and “punish” them by not releasing eggs.

Normalizing the value of a fertilized batch of eggs to 1, table [A1](#) summarizes the resulting “payoffs” (i.e., the reproductive success arising from mating in the female and the male role) of each strategy in each individual state (i.e., carrying or not carrying a batch of eggs). For instance, when a trader carrying eggs meets a withholder carrying eggs, then the trader will agree to mate with probability  $1 - q$  and in this case have its batch of eggs fertilized by the withholder, while the batch of eggs of the withholder is not released. As a result, the trader gets a payoff of  $1 - q$

through the female role and a payoff of 0 through the male role (first row, second column of table A1), while the withholder gets a payoff of 0 through the female role and a payoff of  $1 - q$  through the male role (second row, first column of table A1). Other payoff values are calculated in a similar way.

The model in Henshaw et al. (2014) is recovered from our general model by (i) allowing only for providers and traders, (ii) assuming costs of egg production are zero (by setting  $\lambda = 1$ ), and (iii) ignoring egg senescence (by setting  $\rho = 0$ ).

### Proportions of strategies and of egg carriers

Let  $x$ ,  $y$ , and  $z$  denote the respective proportions of traders, withholders, and providers in the population, satisfying

$$x + y + z = 1, \quad x \geq 0, \quad y \geq 0, \quad z \geq 0, \quad (\text{A1})$$

and let  $\Delta$  denote the set of population shares  $(x, y, z)$  of the three strategies satisfying the conditions in (A1). Similarly, let  $x_e$ ,  $y_e$ , and  $z_e$  denote the proportions (relative to the overall population size) of, respectively, traders carrying eggs, withholders carrying eggs, and providers carrying eggs, with the corresponding proportions of individuals not carrying eggs given by

$$x_o = x - x_e, \quad (\text{A2a})$$

$$y_o = y - y_e, \quad (\text{A2b})$$

$$z_o = z - z_e. \quad (\text{A2c})$$

To abbreviate formulas, it will sometimes be convenient to use  $e$  and  $o$  to denote the population fractions carrying eggs, resp. not carrying eggs:

$$e = x_e + y_e + z_e, \quad (\text{A3a})$$

$$o = x_o + y_o + z_o. \quad (\text{A3b})$$

Table A1: Reproductive success (or “payoffs”) to a given focal individual (rows) when encountering a given partner (columns). The first entry in each cell of the matrix corresponds to reproduction in the female role, while the second entry corresponds to reproduction in the male role. Payoffs are normalized so that the value of one batch of eggs is equal to 1.  $T_e$  (resp.  $T_o$ ) indicates a trader carrying eggs (resp. not carrying eggs). A similar convention applies to the other two strategies, with  $H_e$  and  $H_o$  indicating withholders carrying and not carrying eggs, respectively, and  $P_e$  and  $P_o$  indicating providers carrying and not carrying eggs, respectively.

|       |       | Partner    |            |       |       |       |       |
|-------|-------|------------|------------|-------|-------|-------|-------|
|       |       | $T_e$      | $H_e$      | $P_e$ | $T_o$ | $H_o$ | $P_o$ |
| Focal | $T_e$ | 1,1        | $1 - q, 0$ | 1,1   | 0,0   | 0,0   | 0,0   |
|       | $H_e$ | 0, $1 - q$ | 0,0        | 0,1   | 0,0   | 0,0   | 0,0   |
|       | $P_e$ | 1,1        | 1,0        | 1,1   | 1,0   | 1,0   | 1,0   |
|       | $T_o$ | 0,0        | 0,0        | 0,1   | 0,0   | 0,0   | 0,0   |
|       | $H_o$ | 0,0        | 0,0        | 0,1   | 0,0   | 0,0   | 0,0   |
|       | $P_o$ | 0,0        | 0,0        | 0,1   | 0,0   | 0,0   | 0,0   |

Table A2: Encounter rates of potential partners for a focal individual that is carrying eggs ( $e$ , first row) or not carrying eggs ( $o$ , second row).

|       |     | Partner                             |                                     |                                     |                                             |                                             |                                             |
|-------|-----|-------------------------------------|-------------------------------------|-------------------------------------|---------------------------------------------|---------------------------------------------|---------------------------------------------|
|       |     | $T_e$                               | $H_e$                               | $P_e$                               | $T_o$                                       | $H_o$                                       | $P_o$                                       |
| Focal | $e$ | $m \frac{x_e}{e+\lambda o}$         | $m \frac{y_e}{e+\lambda o}$         | $m \frac{z_e}{e+\lambda o}$         | $m \frac{\lambda x_o}{e+\lambda o}$         | $m \frac{\lambda y_o}{e+\lambda o}$         | $m \frac{\lambda z_o}{e+\lambda o}$         |
|       | $o$ | $\lambda m \frac{x_e}{e+\lambda o}$ | $\lambda m \frac{y_e}{e+\lambda o}$ | $\lambda m \frac{z_e}{e+\lambda o}$ | $\lambda m \frac{\lambda x_o}{e+\lambda o}$ | $\lambda m \frac{\lambda y_o}{e+\lambda o}$ | $\lambda m \frac{\lambda z_o}{e+\lambda o}$ |

### Encounter rates

429 The rate at which a focal individual encounters potential mates has been assumed to depend on whether the focal is carrying eggs (encounter rate  $m$ ) or not (encounter rate  $\lambda m$ ). As a fraction  $e + \lambda o$  of all individuals are available for meetings, a fraction  $x_e / (e + \lambda o)$  of these meetings will  
 432 be with a trader carrying eggs, resulting in the encounter rates of a focal with a trader carrying eggs given in the first column of table A2. The other encounter rates, summarized in table A2, are obtained by analogous reasoning: in each case the encounter rate of the focal is multiplied by  
 435 the probability that a partner who is available for a meeting follows the specified strategy and is in the specified state (carrying or not carrying eggs).

### Female and male reproductive success

438 Female and male reproductive success of the different strategies (traders, withholders, providers) in the different states (carrying or not carrying eggs) can be calculated by combining the information given in tables A1 and A2, as specified in the following.

#### 441 Traders

Consider a focal individual that is a trader and carries a batch of eggs. The expected reproductive success of such an individual through the female function, that we denote by  $w_T^{F,e}$ , is obtained



444 by multiplying (i) the rate at which a trader carrying eggs encounters each type of potential  
partner (first row of table A2) by (ii) the expected number of its egg batches such a partner  
fertilizes (first entry in the corresponding column of the first row of table A1), and summing up  
447 all contributions. This yields

$$w_T^{F,e} = \frac{m}{e + \lambda o} (x_e + (1 - q)y_e + z_e). \quad (\text{A4})$$

Likewise, the expected reproductive success of a trader carrying eggs through the male func-  
tion, that we denote by  $w_T^{M,e}$ , is obtained by multiplying the rate at which a trader carrying eggs  
450 encounters each type of potential partner (first row of table A2) by the expected number of the  
potential partner's egg batches it gets to fertilize (second entry in the corresponding column of  
the first row of table A1), and summing up all contributions. This yields

$$w_T^{M,e} = \frac{m}{e + \lambda o} (x_e + z_e). \quad (\text{A5})$$

453 If the focal trader is not carrying eggs, its reproductive success through the female function  
is obviously

$$w_T^{F,o} = 0, \quad (\text{A6})$$

while its reproductive success through the male function is given by

$$w_T^{M,o} = \frac{m}{e + \lambda o} \lambda z_e, \quad (\text{A7})$$

456 where, similarly to the derivation of (A5), we have combined the information given in the second  
row of table A2 with that of the fourth row of table A1 to obtain (A7).

## Withholders

459 Following a similar procedure as in the case of traders, and employing a similar notation, we ob-  
tain the following expressions for the reproductive success of a focal withholder through female

and male functions, when carrying or not carrying eggs:

$$w_H^{F,e} = 0, \quad (\text{A8})$$

$$w_H^{M,e} = \frac{m}{e + \lambda o} ((1 - q)x_e + z_e), \quad (\text{A9})$$

$$w_H^{F,o} = 0, \quad (\text{A10})$$

$$w_H^{M,o} = \frac{m}{e + \lambda o} \lambda z_e. \quad (\text{A11})$$

462 In particular, note that as withholders never release eggs, they gain no reproductive success through the female function.

### Providers

465 Similarly, for providers we obtain

$$w_P^{F,e} = \frac{m}{e + \lambda o} (e + \lambda o) = m, \quad (\text{A12})$$

$$w_P^{M,e} = \frac{m}{e + \lambda o} (x_e + z_e), \quad (\text{A13})$$

$$w_P^{F,o} = 0, \quad (\text{A14})$$

$$w_P^{M,o} = \frac{m}{e + \lambda o} (\lambda z_e). \quad (\text{A15})$$

### Equality of female and male reproductive values

In our model, as in models with two separate sexes, all offspring have one mother and one  
 468 father, so that at every instance the total number of offspring fathered in the male role must equal the total number of offspring produced in the female role (Fisher, 1930; Fromhage et al., 2016; Houston & McNamara, 2002). With our notation, this means that

$$\underbrace{\sum_{s \in \{e,o\}} (x_s w_T^{F,s} + y_s w_H^{F,s} + z_s w_P^{F,s})}_{w^F} = \underbrace{\sum_{s \in \{e,o\}} (x_s w_T^{M,s} + y_s w_H^{M,s} + z_s w_P^{M,s})}_{w^M} \quad (\text{A16})$$

471 must hold, where  $w^F$  is the population average of the rate of reproduction in the female role and  $w^M$  is the population average of the rate of reproduction in the male role. To verify that this

fundamental consistency condition holds, we can substitute from (A4) – (A15) and simplify to

474 obtain

$$w^F = \frac{m}{e + \lambda o} [x_e (x_e + (1 - q)y_e + z_e) + z_e (e + \lambda o)] \quad (\text{A17})$$

and

$$w^M = \frac{m}{e + \lambda o} [x_e (x_e + z_e) + z_e (x_e + z_e) + y_e (x_e(1 - q) + z_e) + \lambda o]. \quad (\text{A18})$$

Straightforward algebra establishes that these two expressions are identical, so that condition

477 (A16) holds.

## Demographic dynamics and equilibrium

From our assumptions on the encounter rates of different individuals in the population (table

480 A2), we obtain the following system of differential equations adjusting the proportions of egg-carriers within each subpopulation of strategists:

$$\dot{x}_e = x_o - \left[ \rho + \frac{m}{e + \lambda o} (x_e + (1 - q)y_e + z_e) \right] x_e, \quad (\text{A19a})$$

$$\dot{y}_e = y_o - \rho y_e, \quad (\text{A19b})$$

$$\dot{z}_e = z_o - (\rho + m) z_e, \quad (\text{A19c})$$

where dots denote time derivatives. The first (positive) term on the right hand side of these

483 equations gives the rate of flow into the egg-carrying state, and is equal to the proportion of

individuals not carrying eggs following the relevant strategy (times the rate at which individuals produce eggs, that we have normalized to 1). The second (negative) term on the right hand

486 side gives the outflow from the egg-carrying state. Individuals lose their eggs either because of

senescence (explaining the terms proportional to  $\rho$ ) or because they offer their eggs to partners (explaining the terms proportional to  $m$ ). As withholders never give up their eggs when meeting

489 a partner, they only lose eggs due to senescence, so that the outflow from the egg-carrying

state is simply  $\rho y_e$ . Egg-carrying providers lose their eggs at rate rate  $m$  due to encountering partners, as each encountered partner accepts (i.e., fertilizes) the eggs offered by a provider. This

492 explains the form of (A19c). To understand the outflow from the egg-carrying state for traders  
 due to offering up eggs for fertilization, observe that in a meeting with another individual an  
 egg-carrying trader only gives up its eggs if its partner is also carrying eggs and is not identified  
 495 as a withholder. Hence, the proportion of meetings in which an egg-carrying trader provides  
 eggs is given by the proportion of meetings in which this condition is satisfied. As a fraction  
 $e + \lambda o$  of the individuals in the population are available for meetings, this proportion is given by  
 498  $(x_e + (1 - q)y_e + z_e)/(e + \lambda o)$ .

Setting the right hand side of (A19) to zero we find that the demographic equilibrium satisfies

$$x_o = \rho x_e + \frac{m}{e + \lambda o} (x_e + (1 - q)y_e + z_e) x_e, \quad (\text{A20a})$$

$$y_o = \rho y_e, \quad (\text{A20b})$$

$$z_o = \rho z_e + m z_e. \quad (\text{A20c})$$

501 Substituting from (A2) and (A3a), we can rewrite the steady-state equations (A20) solely in terms  
 of  $(x, y, z)$  and  $(x_e, y_e, z_e)$  as

$$x = \left( m \frac{x_e + (1 - q)y_e + z_e}{\lambda + (1 - \lambda)(x_e + y_e + z_e)} + 1 + \rho \right) x_e, \quad (\text{A21a})$$

$$y = (1 + \rho) y_e, \quad (\text{A21b})$$

$$z = (1 + m + \rho) z_e, \quad (\text{A21c})$$

For any  $(x, y, z) \in \Delta$  the equations in (A21) have a unique non-negative solution  $(x_e, y_e, z_e)$   
 504 given by

$$x_e = \frac{-b + \sqrt{b^2 - 4ac}}{2a}, \quad (\text{A22a})$$

$$y_e = \frac{y}{1 + \rho}, \quad (\text{A22b})$$

$$z_e = \frac{z}{1 + m + \rho}, \quad (\text{A22c})$$

where

$$a = m + (1 + \rho)(1 - \lambda), \quad (\text{A23a})$$

$$b = m \left[ \frac{z}{1 + m + \rho} + (1 - q) \frac{y}{1 + \rho} \right] + (1 + \rho) \left[ \lambda + (1 - \lambda) \left( \frac{z}{1 + m + \rho} + \frac{y}{1 + \rho} \right) \right] \quad (\text{A23b})$$

$$- (1 - \lambda)x,$$

$$c = - \left[ \lambda + (1 - \lambda) \left( \frac{z}{1 + m + \rho} + \frac{y}{1 + \rho} \right) \right] x. \quad (\text{A23c})$$

Equations (A22b) and (A22c) are immediate from (A21b) and (A21c). To obtain (A22a), we rewrite

507 (A20a) as

$$x - x_e - \rho x_e = m \frac{z_e + x_e + (1 - q)y_e}{e + \lambda o} x_e \Leftrightarrow \quad (\text{A24})$$

$$[x - (1 + \rho)x_e] [(1 - \lambda)(z_e + x_e + y_e) + \lambda] = mx_e^2 + m [z_e + (1 - q)y_e] x_e. \quad (\text{A25})$$

Rearranging, substituting for  $y_e$  and  $z_e$  from (A22b) and (A22c), and using the definitions in (A23), we obtain that  $x_e$  is given by the unique non-negative solution of the quadratic equation

$$ax_e^2 + bx_e + c = 0, \quad (\text{A26})$$

510 i.e.,  $x_e$  is given by (A22a).

Before proceeding, we note that (A21) can be rearranged as

$$\frac{x_e}{x} = \frac{1}{1 + m \frac{x_e + (1 - q)y_e + z_e}{e + \lambda o} + \rho'}, \quad (\text{A27a})$$

$$\frac{y_e}{y} = \frac{1}{1 + \rho'}, \quad (\text{A27b})$$

$$\frac{z_e}{z} = \frac{1}{1 + m + \rho'}, \quad (\text{A27c})$$

whenever the population share of the strategy under consideration is strictly positive, giving us  
 513 expressions for the fraction of time that an individual following one of these strategies carries  
 eggs or, alternatively, for the probability that a randomly chosen individual of a given strategy  
 is carrying eggs. When the population share of a strategy is zero, we interpret the expressions  
 516  $x_e/x$ ,  $y_e/y$ , and  $z_e/z$  as the corresponding limits (which are well-defined) of the expressions on  
 the right side (A27) as the population share of a strategy goes to zero.

## Expected total reproductive success for each strategy at the demographic equilibrium

519 We assume a separation of time scales such that the demographic dynamics adjusting the propor-  
 tions of egg-carriers to their equilibrium values uniquely determined by (A21) are much faster  
 than the evolutionary dynamics adjusting the proportions of different strategies in the popula-  
 522 tion. For the evolutionary dynamics we take the rate of offspring produced via reproduction in  
 both sex roles as our fitness measure. Hence, for given frequencies  $x$ ,  $y$ , and  $z$ , we take the fitness  
 of each strategy to be the expected total reproductive success at the demographic equilibrium  
 525 values  $x_e$ ,  $y_e$ , and  $z_e$  given by (A22). These fitnesses are calculated as follows.

### Traders

At the demographic equilibrium, a focal trader will be carrying eggs with probability  $x_e/x$  and  
 not carrying eggs with probability  $x_o/x$ . The total expected reproductive success of a trader  
 (through both the female and the male functions) is then given by

$$w_T = \frac{x_e}{x} \left( w_T^{F,e} + w_T^{M,e} \right) + \frac{x_o}{x} \left( w_T^{F,o} + w_T^{M,o} \right).$$

Substituting from (A4)-(A7) and simplifying, we obtain

$$w_T = \frac{m}{e + \lambda o} \left[ \lambda z_e + \frac{x_e}{x} (2x_e + (1 - q)y_e + (2 - \lambda)z_e) \right]. \quad (\text{A28})$$

### Withholders

At the demographic equilibrium, a focal withholder will be carrying eggs with probability  $y_e/y$   
 and not carrying eggs with probability  $y_o/y$ . The total expected reproductive success of a with-  
 holder is then

$$w_H = \frac{y_e}{y} \left( w_H^{F,e} + w_H^{M,e} \right) + \frac{y_o}{y} \left( w_H^{F,o} + w_H^{M,o} \right).$$

Substituting from (A8)-(A11) and simplifying, we obtain

$$w_H = \frac{m}{e + \lambda o} \left[ \lambda z_e + \frac{y_e}{y} ((1 - q)x_e + (1 - \lambda)z_e) \right]. \quad (\text{A29})$$

## 528 Providers

For a focal provider, we obtain

$$w_P = \frac{z_e}{z} \left( w_P^{F,e} + w_P^{M,e} \right) + \frac{z_o}{z} \left( w_P^{F,o} + w_P^{M,o} \right).$$

Substituting from (A12)-(A15) and simplifying, we obtain

$$w_P = \frac{m}{e + \lambda o} \left[ \lambda z_e + \frac{z_e}{z} \left( \lambda + (2 - \lambda)x_e + (1 - \lambda)y_e + 2(1 - \lambda)z_e \right) \right]. \quad (\text{A30})$$

## Evolutionary dynamics

To model the evolutionary dynamics, we make use of the replicator dynamics (Hofbauer &  
531 Sigmund, 1998; Weibull, 1995) with total (expected) fitness in the place of expected payoffs. That is we consider the following system of differential equations:

$$\dot{x} = x (w_T - \bar{w}), \quad (\text{A31a})$$

$$\dot{y} = y (w_H - \bar{w}), \quad (\text{A31b})$$

$$\dot{z} = z (w_P - \bar{w}), \quad (\text{A31c})$$

where dots denote time derivatives and

$$\bar{w} = xw_T + yw_H + zw_P$$

534 is the average fitness in the population. The frequencies  $x$ ,  $y$ ,  $z$  can vary within the simplex  $\Delta$  defined by (A1).

The replicator dynamics is invariant to transformations that add the same function to all  
537 payoffs or multiply payoffs by the same positive function (this last invariance up to a change of speed). We can then subtract the common term  $m\lambda z_e / (e + \lambda o)$  from the expressions for  $w_T$ ,  $w_H$ , and  $w_P$  given in equations (A28), (A29), and (A30), and then multiply the resulting expressions  
540 by  $(e + \lambda o) / m$  to obtain the renormalized fitnesses (which, with slight abuse of notation, we

continue to denote by  $w_P$ ,  $w_T$  and  $w_H$ ):

$$w_T = \frac{x_e}{x} [2x_e + (1 - q)y_e + (2 - \lambda)z_e], \quad (\text{A32a})$$

$$w_H = \frac{y_e}{y} [(1 - q)x_e + (1 - \lambda)z_e], \quad (\text{A32b})$$

$$w_P = \frac{z_e}{z} [\lambda + (2 - \lambda)x_e + (1 - \lambda)y_e + 2(1 - \lambda)z_e]. \quad (\text{A32c})$$

Introducing the abbreviations (where the second equality in the first line follows from the  
 543 definitions in (A3))

$$\alpha = x_e + (1 - q)y_e + z_e = e - qy_e, \quad (\text{A33a})$$

$$\beta = \lambda + (1 - \lambda)e, \quad (\text{A33b})$$

$$\gamma = x_e + (1 - \lambda)z_e, \quad (\text{A33c})$$

we can rewrite (A32) as

$$w_T = \frac{x_e}{x} (\alpha + \gamma), \quad (\text{A34a})$$

$$w_H = \frac{y_e}{y} (\gamma - qx_e), \quad (\text{A34b})$$

$$w_P = \frac{z_e}{z} (\beta + \gamma). \quad (\text{A34c})$$

Replacing the ratios on the right side of these equations by the expressions in equation (A27) and  
 546 using (from (A27a), (A33a), and (A33b))

$$\frac{x_e}{x} = \frac{\beta}{\beta(1 + \rho) + m\alpha'}$$

yields

$$w_T = \frac{\beta(\alpha + \gamma)}{\beta(1 + \rho) + m\alpha'}, \quad (\text{A35a})$$

$$w_H = \frac{\gamma - qx_e}{1 + \rho}, \quad (\text{A35b})$$

$$w_P = \frac{\beta + \gamma}{1 + m + \rho}. \quad (\text{A35c})$$



## Appendix B: Analysis of the Evolutionary Dynamics

549 The replicator dynamics (A31) has three trivial rest points at the corners of the simplex  $\Delta$ :  
 $(x, y, z) = (1, 0, 0)$ ,  $(x, y, z) = (0, 1, 0)$ , and  $(x, y, z) = (0, 0, 1)$ . With slight abuse of notation,  
we denote these rest points by T, H, and P, respectively. In addition to analyzing the stability of  
552 the trivial rest points, our analysis consist in identifying the number, location, and stability of  
non-trivial rest points, and in how the phase portraits of our model depend on parameter values.

Our analysis proceeds in six steps. First, we obtain convenient expressions for the pairwise  
555 comparison of the renormalized fitnesses in (A35) which provide the basis for much of the sub-  
sequent analysis (Section [Pairwise fitness comparisons](#)). Second, we show that the replicator  
dynamics (A31) has no interior rest point, that is, no rest point  $(x, y, z)$  in the interior of  $\Delta$ , i.e.,  
558 where  $x > 0$ ,  $y > 0$ , and  $z > 0$  (Section [The replicator dynamics has no interior rest point](#)). Thus,  
if the replicator dynamics has any rest points but the trivial ones, these must be located on the  
edges of the simplex. Third, we investigate the dynamics along the three edges of the simplex  $\Delta$ ,  
561 thereby identifying how the number and location of the rest points on the edges of the simplex  
depend on the parameters of the model (Section [Dynamics on the edges](#)). This analysis pro-  
vides us with much of the requisite information to determine the stability properties of all the  
564 rest points. Fourth, we complete the stability analysis for the non-trivial rest points identified  
in the third step (Section [Stability analysis of the non-trivial rest points](#)). Fifth, we summarize  
our results by identifying the five disjoint regions in our parameter space, each one characterized  
567 by qualitatively different phase portraits, shown in fig. 1 in the main text (Section [Dynamical  
regions](#)). Sixth, we provide for formal underpinnings for fig. 2 in the main text, showing how  
the five regions identified in the fifth step change as the parameters  $q$  and  $\rho$  change (Section  
570 [Effects of varying  \$q\$  and  \$\rho\$  on the dynamical regions](#)). All together, these results provide us with  
a complete qualitative picture of the evolutionary dynamics of our model.

Throughout the following we write  $=_s$  to indicate that two expressions have the same sign  
573 (either  $+$ ,  $-$ , or  $0$ ).

## Pairwise fitness comparisons

### Comparison of $w_P$ and $w_T$

576 From (A35a) and (A35c) we obtain that  $w_P = w_T$  holds if and only if  $\beta(1 + \rho) = m\gamma$ :

$$\begin{aligned} w_P = w_T &\Leftrightarrow [\beta(1 + \rho) + m\alpha] (\beta + \gamma) = \beta (1 + m + \rho) (\alpha + \gamma) \\ &\Leftrightarrow [\beta(1 + \rho) + m\alpha] \beta + m\alpha\gamma = \beta (1 + m + \rho) \alpha + m\beta\gamma \\ &\Leftrightarrow (\beta - \alpha) [\beta(1 + \rho) - m\gamma] = 0 \\ &\Leftrightarrow \beta(1 + \rho) = m\gamma, \end{aligned}$$

where the last equivalence follows from observing, first, that from (A33a) and (A33b) we have  $\beta - \alpha = \lambda(1 - e) + qy_e$  and, second, that the latter expression is strictly positive as we have  
579 assumed  $\lambda > 0$  and every steady-state satisfies  $e < 1$  – unless we have  $\rho = 0$  and  $y = 1$ , in which case the term  $qy_e = qy$  is strictly positive as we have assumed  $q > 0$ .

The same line of reasoning holds when we start with inequality rather than equality, showing

$$w_P - w_T =_s \beta(1 + \rho) - m\gamma. \quad (\text{B1})$$

### 582 Comparison of $w_P$ and $w_H$

Using (A35b) and (A35c) we obtain

$$\begin{aligned} w_P = w_H &\Leftrightarrow (1 + \rho) (\beta + \gamma) = (1 + m + \rho) (\gamma - qx_e) \\ &\Leftrightarrow \beta(1 + \rho) = m\gamma - (1 + m + \rho) qx_e. \end{aligned}$$

Similar reasoning implies that the sign of  $w_P - w_H$  coincides with the sign of  $\beta(1 + \rho) - m\gamma +$   
585  $(1 + m + \rho) qx_e$ :

$$w_P - w_H =_s \beta(1 + \rho) - m\gamma + (1 + m + \rho) qx_e. \quad (\text{B2})$$

## Comparison of $w_T$ and $w_H$

Using (A35a) and (A35b) we obtain

$$\begin{aligned}
 w_T = w_H &\Leftrightarrow (1 + \rho) \beta(\alpha + \gamma) = [\beta(1 + \rho) + m\alpha] (\gamma - qx_e) \\
 &\Leftrightarrow \beta(1 + \rho)(\alpha + qx_e) = m\alpha (\gamma - qx_e) \\
 &\Leftrightarrow \alpha\beta(1 + \rho) = \alpha m\gamma - \alpha \left[ \frac{\beta}{\alpha}(1 + \rho) + m \right] qx_e \\
 &\Leftrightarrow \beta(1 + \rho) = m\gamma - \left[ \frac{\beta}{\alpha}(1 + \rho) + m \right] qx_e,
 \end{aligned}$$

588 where we have used  $\alpha > 0$  (from (A33a),  $e \geq y_e$ ,  $q < 1$ , and  $e > 0$  for all  $(x, y, z) \in \Delta$ ) to obtain the last two equivalences. Similar reasoning implies that the sign of  $w_T - w_H$  coincides with the sign of  $\beta(1 + \rho) - m\gamma + \left[ \frac{\beta}{\alpha}(1 + \rho) + m \right] qx_e$  or:

$$w_T - w_H =_s \beta(1 + \rho) - m\gamma + (1 + m + \rho)qx_e + \left( \frac{\beta}{\alpha} - 1 \right) (1 + \rho)qx_e. \quad (\text{B3})$$

## 591 The replicator dynamics has no interior rest point

If  $(x, y, z)$  is an interior rest point of the replicator dynamics, then the associated  $(x_e, y_e, z_e)$  satisfies  $x_e > 0$ ,  $y_e > 0$ , and  $z_e > 0$ , and we have  $w_P = w_T = w_H$ . In particular, we must have  
 594  $w_P = w_T$  and  $w_P = w_H$ . From (B1) and (B2) these equalities are equivalent to  $\beta(1 + \rho) = m\gamma$  and  $\beta(1 + \rho) = m\gamma - (1 + m + \rho)qx_e$ . Substituting the first of these equalities into the second yields  $qx_e = 0$ . Because  $q > 0$  holds, this contradicts  $x_e > 0$ . Therefore, no interior rest point exists. As  
 597 a corollary, we also have that there are no closed orbits in the system (Strogatz, 1994, p. 180).

## Dynamics on the edges

### TP-edge

600 On the TP-edge, the dynamics depend on how  $m$  compares to  $1 + \rho$  and on how  $\lambda$  compares to the critical values

$$\lambda_* = \frac{m - (1 + \rho)}{\rho(1 + \rho) + m(2 + \rho)}, \quad (\text{B4})$$

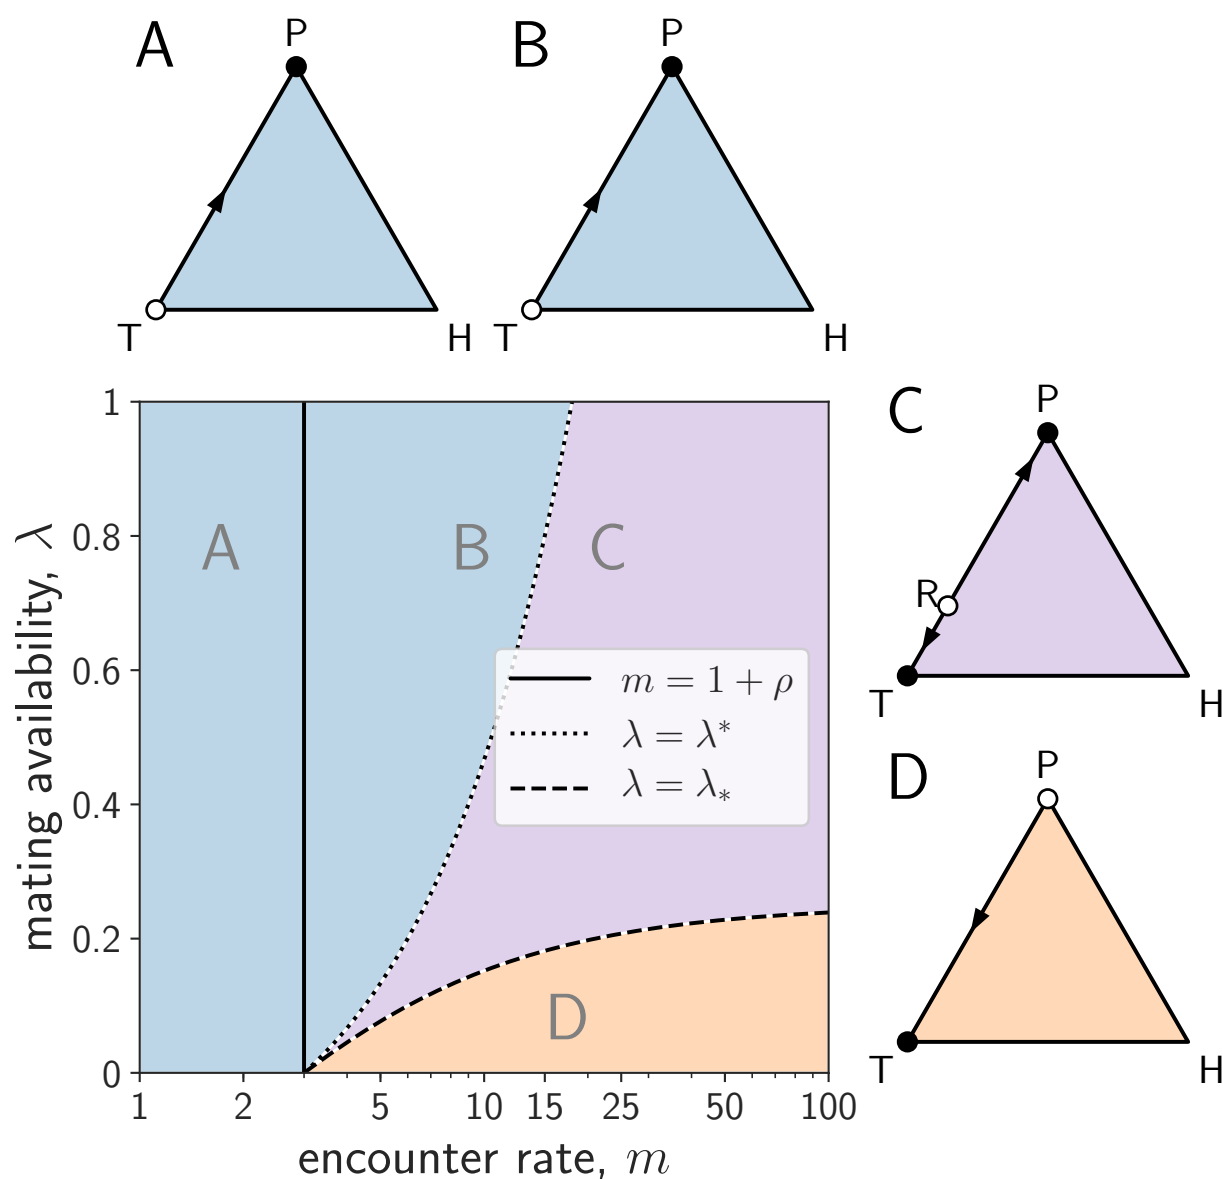

Figure B1: Evolutionary dynamics on the TP-edge. If  $m \leq 1 + \rho$ , then P dominates T (A). The same is true if  $m > 1 + \rho$  and  $\lambda \geq \lambda^*$  (B). If  $\lambda_* < \lambda < \lambda^*$ , there is bistability with both T and P being stable along the TP-edge (C). If  $\lambda \leq \lambda_*$ , T dominates P (D). Full (resp. empty) circles represent stable (resp. unstable) equilibria along the TP-edge. Parameters:  $\rho = 2$ ,  $q = 0.5$ ,  $m = 0.8$  (A), 8 (B), 20 (C) or 15 (D), and  $\lambda = 0.75$  (A, B, and C), or 0.05 (D).

and

$$\lambda^* = \frac{m - (1 + \rho)}{(1 + \rho)(1 + 2\rho)}, \quad (\text{B5})$$

603 which for  $m > 1 + \rho$  satisfy  $\lambda_* < \lambda^*$ , in the following way (fig. B1):

1. If  $m \leq 1 + \rho$ , then providing dominates trading, i.e., the dynamics on the TP-edge are unidirectional leading from T to P (fig. B1A).

606 2. If  $m > 1 + \rho$  and  $\lambda^* \leq \lambda$ , then providing dominates trading (fig. B1B).

3. If  $m > 1 + \rho$  and  $\lambda_* < \lambda < \lambda^*$ , there is bistability, i.e., there exists a critical proportion of traders  $x_R \in (0, 1)$  such that  $R = (x_R, 0, 1 - x_R)$  is a rest point of the replicator dynamics and on the TP-edge the dynamics lead to P for  $x < x_R$  and to T for  $x > x_R$  (fig. B1C). For  
609  $\lambda = 1$  this critical proportion of traders is given by

$$x_R = \frac{(1 + \rho) [2(1 + \rho)^2 + (3 + 2\rho)m]}{m(2 + m + 2\rho)}, \quad (\text{B6})$$

while for  $0 < \lambda < 1$  it is given by

$$x_R = \frac{\zeta - \eta\sqrt{\theta}}{\iota}, \quad (\text{B7})$$

612 where

$$\begin{aligned} \zeta &= m^3 - (2 + \rho - 5\lambda - 4\lambda\rho)m^2 - (1 + \rho)(1 - 7\lambda + 4\lambda^2 + \rho - 4\lambda\rho + \lambda^2\rho)m \\ &\quad + (1 - \lambda)(1 + \rho)^2(2 + \rho + \lambda\rho), \end{aligned} \quad (\text{B8a})$$

$$\eta = (1 + m + \rho) [m - (1 - \lambda)(1 + \rho)], \quad (\text{B8b})$$

$$\theta = [m - (2 + \rho + \lambda\rho)]^2 + 8\lambda(1 + \rho)m, \quad (\text{B8c})$$

$$\iota = 4\lambda(1 - \lambda)(1 + \rho)m. \quad (\text{B8d})$$

4. If  $m > 1 + \rho$  and  $\lambda \leq \lambda_*$ , then trading dominates providing, i.e., the dynamics on the TP-edge are unidirectional, leading from P to T (fig. B1D).

615 To show the above claims, note that, as indicated in (B1), the sign of the payoff difference  $w_P - w_T$  coincides with the sign of  $\beta(1 + \rho) - m\gamma$ . On the TP-edge,  $y = 0$  holds and hence  $y_e = 0$  and  $e = x_e + z_e$  hold. Replacing the expressions for  $\beta$  and  $\gamma$  from their definitions (A33b) – (A33c) we  
618 thus obtain

$$\begin{aligned} w_P - w_T &= [\lambda + (1 - \lambda)(x_e + z_e)](1 + \rho) - m[x_e + (1 - \lambda)z_e] \\ &= \lambda(1 + \rho - mx_e) + (1 - \lambda)(x_e + z_e)(1 + \rho - m). \end{aligned} \quad (\text{B9})$$

As both  $x_e$  and  $z_e$  are uniquely determined by  $x$  on the TP-edge, the latter explicitly as

$$z_e = \frac{1 - x}{1 + m + \rho} \quad (\text{B10})$$

(by (A22c) and  $z = 1 - x$ ) and the former by the unique solution to the equation (cf. (A21a))

$$x = \left( m \frac{x_e + z_e}{\lambda + (1 - \lambda)(x_e + z_e)} + 1 + \rho \right) x_e, \quad (\text{B11})$$

621 we may view the expression on the right side of (B9) as a function of  $x$  defined on the domain  $x \in [0, 1]$ , that we denote by  $h(x)$ .

For  $m \leq 1 + \rho$ , the function  $h(x)$  is positive so that  $w_P - w_T > 0$  holds for all  $x \in [0, 1]$ . This  
624 establishes the result for the first of the above cases.

In the remaining three cases we have  $m > 1 + \rho$ , which we may therefore impose as an assumption. We structure the argument for these cases as follows: First, we show that  $h(x)$  is  
627 a decreasing function of  $x$ . Second, we assess how the extreme values  $h(0)$  and  $h(1)$  compare to zero. In particular, (i) if  $h(0) \leq 0$  then  $h(x) < 0$  and hence  $w_P - w_T < 0$  holds for  $x > 0$  (trading dominates providing), (ii) if  $h(1) \geq 0$  then  $h(x) > 0$  and hence  $w_P - w_T > 0$  holds for  
630  $0 \leq x < 1$  (providing dominates trading), (iii) if  $h(1) < 0 < h(0)$  then there is bistability, as the fitness difference  $w_P - w_T$  is positive for  $x \in [0, x_R)$  and negative for  $(x_R, 1]$ , where  $x_R$  is a root of  $h(x)$  such that  $h(x_R) = 0$ .

633 To show that  $h(x)$  is decreasing in  $x$ , we consider the derivative of  $h(x)$ , given by

$$\frac{dh}{dx} = -\lambda m \frac{dx_e}{dx} + (1 - \lambda)(1 + \rho - m) \frac{d(x_e + z_e)}{dx}. \quad (\text{B12})$$

Using the inequality  $m > 1 + \rho$ , this is negative if both derivatives appearing on the right side of (B12) are positive. To show that this is the case, we differentiate both sides of the identity (B11)

636 with respect to  $x$  to obtain

$$1 = \frac{dx_e}{dx} [1 + \rho + Am] + mx_e \frac{dA}{d(x_e + z_e)} \frac{d(x_e + z_e)}{dx}. \quad (\text{B13})$$

where we have used the abbreviation  $A = (x_e + z_e)/(\lambda + (1 - \lambda)(x_e + z_e))$ . Using  $d(x_e + z_e)/dx = dx_e/dx + dz_e/dx$  and solving for  $dx_e/dx$  we get

$$\frac{dx_e}{dx} = \frac{1 - mx_e \frac{dA}{d(x_e + z_e)} \frac{dz_e}{dx}}{1 + \rho + Am + mx_e \frac{dA}{d(x_e + z_e)}}. \quad (\text{B14})$$

639 A straightforward calculation verifies that we have  $dA/d(x_e + z_e) > 0$ . As we also have  $dz_e/dx < 0$  and  $A > 0$ , it follows from (B14) that  $dx_e/dx > 0$  holds. It remains to exclude the possibility that  $d(x_e + z_e)/dx \leq 0$  in equation (B12). Towards this end, we observe that if  $d(x_e + z_e)/dx \leq 0$  holds, 642 then (B13) implies  $dx_e/dx \geq 1/(1 + \rho + Am)$ . As  $A < 1$  holds, we also have  $1/(1 + \rho + Am) > 1/(1 + \rho + m)$ , so that  $dx_e/dx > 1/(1 + \rho + m)$ . As  $dz_e/dx = -1/(1 + \rho + m)$  it then follows that  $d(x_e + z_e)/dx > 0$  holds, yielding a contradiction. We conclude that  $h(x)$  is a decreasing function 645 of  $x$ .

Next, we determine the sign of  $h(0)$ . For  $x = 0$  we have  $x_e = 0$  and  $e = z_e = 1/(1 + m + \rho)$ .

Therefore,

$$h(0) = \lambda(1 + \rho) + \frac{(1 - \lambda)(1 + \rho - m)}{1 + m + \rho} \quad (\text{B15})$$

$$= {}_s (1 + m + \rho)\lambda(1 + \rho) + (1 - \lambda)(1 + \rho - m). \quad (\text{B16})$$

648 Consequently, the sign of  $h(0)$  coincides with the sign of  $\lambda - \lambda_*$ , where  $\lambda_*$  is given by equation (B4).

In particular, the conditions  $m > 1 + \rho$  and  $\lambda \leq \lambda_*$  ensure that  $h(x)$  is decreasing and that 651  $h(0) \leq 0$  holds. Consequently, under these conditions we have  $h(x) < 0$  for  $x > 0$ , so that trading is dominant on the TP-edge. This establishes the fourth of the above claims.

It remains to consider  $m > 1 + \rho$  and  $\lambda > \lambda_*$ . Here we have that  $h(x)$  is decreasing and 654  $h(0) > 0$  holds. Therefore, if  $h(1) \geq 0$  holds, then providing is dominant on the TP-edge (i.e., we

are in the second of the above cases). Otherwise, i.e., if  $h(1) < 0$  holds, then there exists a unique value  $0 < x_R < 1$  such that  $h(x_R) = 0$  holds and there is bistability on the TP-edge with the rest  
657 point corresponding to  $x_R$  separating the basins of attraction of T and P (i.e., we are in the third of the above cases). It remains to link the above conditions on the sign of  $h(1)$  to the conditions on  $\lambda$  appearing in our claims.

660 Consider the condition for  $h(1) \geq 0$ , ensuring that providing is dominant along the TP-edge. As  $x = 1$  implies  $z_e = 0$ , from (B9) we have

$$h(1) = \lambda(1 + \rho - mx_e) + (1 - \lambda)x_e(1 + \rho - m), \quad (\text{B17})$$

and from (B11) we have

$$\lambda + (1 - \lambda)x_e = \{mx_e + (\rho + 1)[\lambda + (1 - \lambda)x_e]\}x_e. \quad (\text{B18})$$

663 The unique positive solution to the quadratic implicitly defined by (B18) is

$$x_e = \frac{1 - \lambda(2 + \rho) + \sqrt{4\lambda m + (1 + \lambda\rho)^2}}{2[m + (1 - \lambda)(1 + \rho)]}. \quad (\text{B19})$$

From equation (B17), and noting that  $m > (1 + \rho)(1 - \lambda)$  holds (since we assumed that  $m > 1 + \rho$  holds), the condition  $h(1) \geq 0$  can be then written as

$$x_e \leq \frac{\lambda(1 + \rho)}{m - (1 + \rho)(1 - \lambda)}.$$

666 Substituting equation (B19) into the above expression, rearranging, and simplifying, we obtain that  $h(1) \geq 0$  is equivalent to

$$\sqrt{4\lambda m + (1 + \lambda\rho)^2} (m - (1 + \rho)(1 - \lambda)) \leq B, \quad (\text{B20})$$

where we have defined

$$B = (1 - \lambda)(1 + \rho)(1 + \lambda\rho) + m[\lambda(4 + 3\rho) - 1] \quad (\text{B21})$$

$$= -\rho(1 + \rho)\lambda^2 + [m(4 + 3\rho) + (\rho - 1)(1 + \rho)]\lambda + 1 + \rho - m. \quad (\text{B22})$$



669 The expression on the left hand side of (B20) is positive.  $B$  can be either negative or non-  
negative, depending on parameter values. If  $B$  is negative, condition (B20) cannot hold, and  
hence  $h(1) < 0$  must hold. If  $B$  is non-negative, taking squares of both sides of (B20) and  
672 simplifying shows that  $\lambda \geq \lambda^*$  (where  $\lambda^*$  is given by equation (B5)) is a necessary and sufficient  
condition for (B20) (and hence  $h(1) \geq 0$ ) to hold. In particular, no matter the sign of  $B$ ,  $h(1) < 0$   
holds if  $\lambda < \lambda^*$ .

675 To show that  $h(1) \geq 0$  holds if  $\lambda > \lambda^*$ , it remains to exclude the possibility that  $B$  is negative  
when  $\lambda > \lambda^*$ . From (B21), a necessary condition for  $B$  to be negative is that

$$\lambda < \hat{\lambda}, \quad (\text{B23})$$

where

$$\hat{\lambda} = \frac{1}{4 + 3\rho}. \quad (\text{B24})$$

678 We could have the following two scenarios:

First,  $\lambda^* \geq \hat{\lambda}$ . In this case,  $\lambda \geq \lambda^*$  implies that condition (B23) is violated, so that  $B$  is  
non-negative.

681 Second,  $\lambda^* < \hat{\lambda}$ . Then, if  $\hat{\lambda} \leq \lambda$  also holds, condition (B23) is violated and  $B$  is non-negative.  
It remains to show that  $B$  is non-negative if  $\lambda^* < \lambda < \hat{\lambda}$  holds. To do so, note that  $B$  can be  
written as a quadratic function in  $\lambda$  (equation (B22)),  $B(\lambda)$ . In this case,  $B(\lambda)$  has two roots in  
684 the positive axis, and  $B(0) < 0$  and  $\lim_{\lambda \rightarrow \infty} B(\lambda) < 0$  hold for  $m > 1 + \rho$ . Since  $B(\lambda^*) > 0$  and  
 $B(\hat{\lambda}) > 0$  hold for  $m > 1 + \rho$ , this implies that  $B(\lambda)$  is positive in the whole interval  $[\lambda^*, \hat{\lambda}]$ .

We conclude that  $h(1) \geq 0$  holds if  $\lambda \geq \lambda^*$  and that  $h(1) < 0$  holds if  $\lambda^* < \lambda < \lambda^*$ .

687 To find the value  $x_R \in (0, 1)$  such that  $h(x_R) = 0$  holds when there is bistability, first assume  
that  $\lambda = 1$  holds. Then the right hand side of (B9) reduces to  $1 + \rho - mx_e$ , so that  $h(x_R) = 0$  is  
equivalent to

$$x_e = \frac{1 + \rho}{m}.$$

690 Replacing equation (A22a) into this expression (with  $\lambda = 1$ ,  $x = x_R$ ,  $y = 0$ ,  $z = 1 - x_R$ ), solving  
for  $x_R$ , and simplifying, yields the expression for  $x_R$  given in equation (B6).

Assuming now that  $0 < \lambda < 1$ ,  $h(x_R) = 0$  is equivalent to

$$x_e = \frac{\lambda(1 + \rho) + z_e(1 - \lambda)(1 + \rho - m)}{m - (1 - \lambda)(1 + \rho)}.$$

693 Replacing equation (A22a) and equation (B10) into this expression (with  $x = x_R$ ,  $y = 0$ ,  $z = 1 - x_R$ ), solving for  $x_R$ , and simplifying, yields the expression for  $x_R$  given in equation (B7).

### HP-edge

696 On the HP-edge, the dynamics depend on how  $\lambda$  compares to the critical value  $\lambda_*$  given in equation (B4) in the following way (fig. B2):

1. If  $\lambda \geq \lambda_*$ , then providing dominates withholding, i.e., the dynamics on the HP-edge are  
699 unidirectional and lead from H to P (fig. B2A).
2. If  $\lambda < \lambda_*$ , then providers can invade H, withholders can invade P, and there exists one  
702 further rest point  $S = (0, y_S, 1 - y_S)$  on the HP-edge (fig. B2B). The proportion of providers at this rest point is given by

$$y_S = 1 - \frac{(1 + \lambda\rho)(1 + m + \rho)}{2m(1 - \lambda)}. \quad (\text{B25})$$

To show this, note that on the HP-edge,  $x = 0$  and hence  $x_e = 0$  holds. Therefore, as indicated in (B2), the sign of the payoff difference  $w_P - w_H$  coincides with the sign of  $\beta(1 + \rho) - m\gamma$ .  
705 Replacing the expressions for  $\beta$  and  $\gamma$  from their definitions (A33b) – (A33c) and using  $e = y_e + z_e$  we thus obtain

$$w_P - w_H =_s [\lambda + (1 - \lambda)(y_e + z_e)](1 + \rho) - m(1 - \lambda)z_e.$$

Replacing the expressions for  $y_e$  and  $z_e$  (equation (A22b) and (A22c)) with  $y = 1 - z$ , and simpli-  
708 fying, we obtain

$$w_P - w_H =_s n(y), \quad (\text{B26})$$

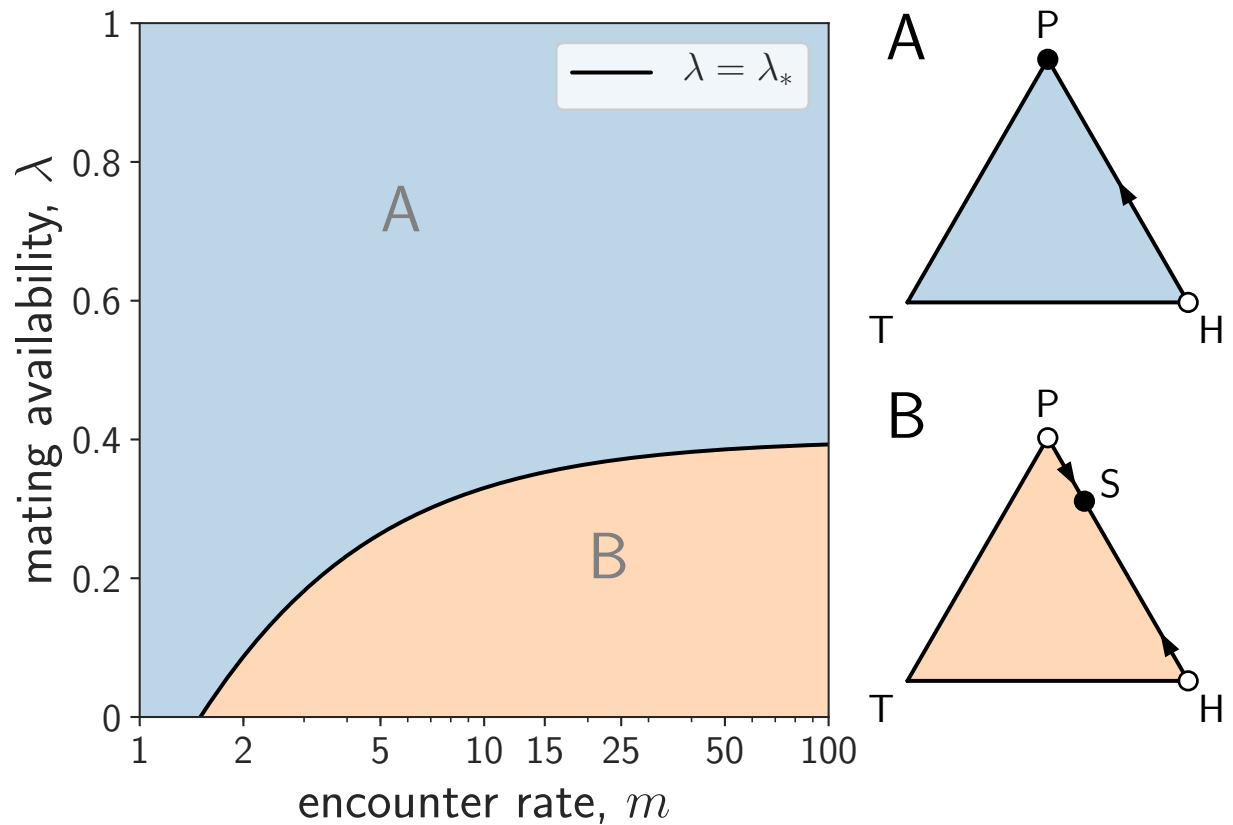

Figure B2: Evolutionary dynamics on the HP-edge. If  $\lambda \geq \lambda_*$ , providing dominates withholding (A). If  $\lambda < \lambda_*$ , traders invade P, providers invade T, and the two strategies coexist at a polymorphic equilibrium S (B). Full (resp. empty) circles represent stable (resp. unstable) equilibria along the HP-edge. Parameters:  $\rho = 0.5, q = 0.5, m = 5$  (A), or 20 (B), and  $\lambda = 0.7$  (A), or 0.2 (B).

where

$$n(y) = (1 + \lambda\rho)(1 + m + \rho) - 2m(1 - \lambda)(1 - y). \quad (\text{B27})$$

Since  $n(1) = (1 + \lambda\rho)(1 + m + \rho)$  is positive, the linear function  $n(y)$  (and hence the payoff difference (B26)) is either positive for all  $y \in (0, 1]$ , or has a single sign change from negative to positive at some  $y_S \in (0, 1)$  on the HP-edge.

A necessary and sufficient condition for  $n(y)$  to change sign is that  $n(0) < 0$  holds. This condition is satisfied if and only if  $\lambda < \lambda_*$ , where  $\lambda_*$  is given by equation (B4). In this case, the point  $y_S$  at which the direction of selection changes is found by solving the linear equation  $n(y_S) = 0$  for  $y_S$ . If  $\lambda \geq \lambda_*$ ,  $n(0) \geq 0$ , then the sign of  $n(y)$  (and hence of the payoff difference (B26)) is positive in the relevant interval. This establishes our claims.

### TH-edge

On the TH-edge, the dynamics depend on how  $\lambda$  compares to the critical value

$$\bar{\lambda} = \frac{m(1 - q)^2 - (1 - q^2)(1 + \rho)}{(1 + q)(1 + \rho)(1 + q + 2\rho)} \quad (\text{B28})$$

in the following way (fig. B3):

1. If  $\lambda \geq \bar{\lambda}$ , then trading dominates withholding, i.e., the dynamics on the TH-edge are unidirectional, leading from H to T (fig. B3A).
2. If  $\lambda < \bar{\lambda}$ , then traders can invade H, withholders can invade T, and there exists one further rest point  $Q = (x_Q, 1 - x_Q, 0)$  on the TH-edge (fig. B3B). The proportion of traders  $x_Q$  at this rest point is given by

$$x_Q = \frac{-\epsilon + \sqrt{\epsilon^2 - 4\delta\phi}}{2\delta}, \quad (\text{B29})$$

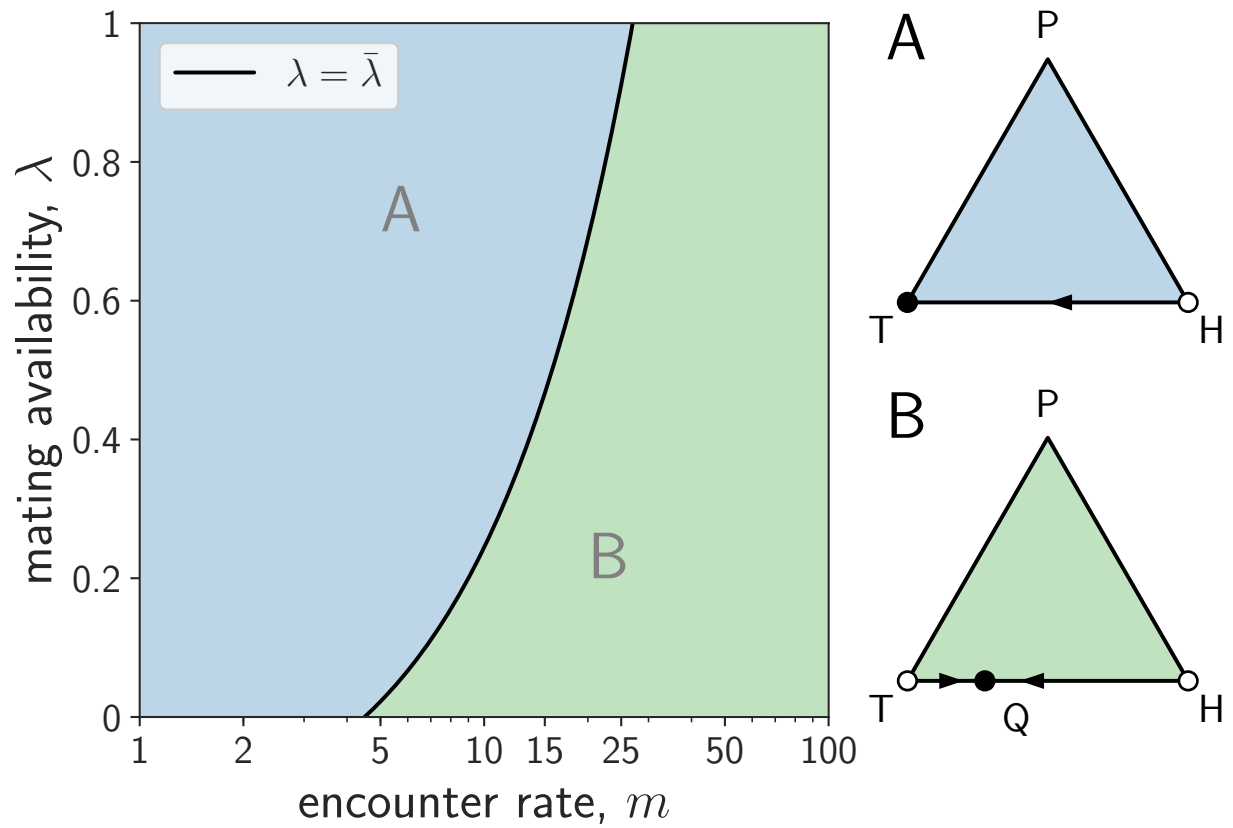

Figure B3: Evolutionary dynamics on the TH-edge. If  $\lambda \geq \bar{\lambda}$ , trading dominates withholding (A). If  $\lambda < \bar{\lambda}$ , rare traders invade H, rare withholders invade T, and the two strategies coexist at a polymorphic equilibrium Q (B). Parameters:  $\rho = 0.5$ ,  $q = 0.5$ ,  $m = 5$  (A), or 20 (B), and  $\lambda = 0.7$  (A), or 0.2 (B).

726

where

$$\delta = \frac{q^2(1-\lambda)}{1+\rho}, \quad (\text{B30a})$$

$$\epsilon = \frac{m(1-q)^2 - 2q(1+\rho)[q + \lambda(1-q+\rho)]}{2(1+\rho)^2}, \quad (\text{B30b})$$

$$\phi = -\frac{(1-q)\{m(1-q) + (1+\rho)[1+q + \lambda(1-q+2\rho)]\}}{4(1+\rho)^2}. \quad (\text{B30c})$$

Moreover,  $x_Q$  is decreasing in  $m$  and tends to  $1/2$  as  $m$  grows large.

To show this, note that on the TH-edge,  $z = 0$  and hence  $z_e = 0$  holds. Setting  $z_e = 0$  in  
729 equation (A32) we obtain

$$w_T = \frac{x_e}{x} [2x_e + (1-q)y_e],$$

$$w_H = \frac{y_e}{y} (1-q)x_e.$$

Replacing the expression for  $y_e$  (equation (A22b)) with  $y = 1 - x$  into the above payoffs and simplifying, we obtain

$$w_T - w_H = \frac{x_e}{(1+\rho)x} f(x) =_s f(x),$$

732 as  $x_e/[(1+\rho)x]$  is always positive for  $x \in (0, 1)$ , and where we have defined

$$f(x) = 2(1+\rho)x_e + (1-q)(1-2x).$$

Along the TH-edge,  $x_e$  is given by equation (A22a), with

$$a = m + (1+\rho)(1-\lambda), \quad (\text{B31a})$$

$$b = m(1-q)\frac{1-x}{1+\rho} + (1+\rho)\left[\lambda + (1-\lambda)\frac{1-x}{1+\rho}\right] - (1-\lambda)x, \quad (\text{B31b})$$

$$c = -\left[\lambda + (1-\lambda)\frac{1-x}{1+\rho}\right]x. \quad (\text{B31c})$$

It is clear that  $f(0) = 1 - q > 0$ , and that the roots of  $f(x)$  satisfy

$$x_e = \ell, \quad (\text{B32})$$

735 where we have used the abbreviation

$$\ell = \frac{(1-q)(2x-1)}{2(1+\rho)}. \quad (\text{B33})$$

In particular, since  $x_e \geq 0$  and  $\ell < 0$  always holds if  $x < 1/2$ , it must be that roots of  $f(x)$  can only exist in the interval  $[1/2, 1]$ .

738 Substituting (A22a) into (B32) we obtain

$$\begin{aligned} \frac{-b + \sqrt{b^2 - 4ac}}{2a} &= \ell \\ \sqrt{b^2 - 4ac} &= b + 2a\ell \\ b^2 - 4ac &= b^2 + 4ab\ell + 4a^2\ell^2 \\ -c &= b\ell + a\ell^2 \\ 0 &= g, \end{aligned}$$

where we defined

$$g = c + b\ell + a\ell^2, \quad (\text{B34})$$

which can be viewed as a function of  $x$ ,  $g(x)$ . Note that the roots of  $f(x)$  and  $g(x)$  coincide.

741 Moreover, since  $b$  and  $\ell$  are linear in  $x$  and  $c$  is quadratic in  $x$ ,  $g(x)$  is a quadratic function of  $x$  that can be rewritten as

$$g(x) = \delta x^2 + \epsilon x + \phi, \quad (\text{B35})$$

744 for real coefficients  $\delta$ ,  $\epsilon$ , and  $\phi$ . Replacing the expressions for  $a$ ,  $b$ ,  $c$  (given in (B31)) and the expression for  $\ell$  (given in equation (B33)), into (B34) and simplifying we obtain the values of these coefficients as given by (B30). Since  $\delta > 0$  and  $\phi < 0$  always hold, and by Descartes' rule of signs,  $g(x)$  (and hence  $f(x)$ ) has exactly one positive root  $x_Q$ , given by equation (B29). Since 747  $g(0) = \phi < 0$ , a necessary and sufficient condition for  $x_Q < 1$  is that  $g(1) > 0$  holds. Substituting  $x = 1$  into equation (B35) and simplifying, we get

$$g(1) = \frac{m(1-q)^2 - (1+q)(1+\rho)[1-q + \lambda(1+q+2\rho)]}{4(1+\rho)^2}. \quad (\text{B36})$$

From this expression, it is immediate that a necessary and sufficient condition for  $g(1) > 0$  (and hence  $f(1) < 0$ ) is that the numerator of (B36) is positive, which obtains if and only if  $\lambda < \bar{\lambda}$ , where  $\bar{\lambda}$  is given by (B28). In this case, and since  $f(0) > 0$ ,  $f(x)$  is positive for  $x \in [0, x_Q)$  and negative for  $(x_Q, 1]$ . This establishes that the condition  $\lambda < \bar{\lambda}$  ensures that traders and withholders invade each other and coexist at an equilibrium frequency  $x_Q$  given by equation (B29). Otherwise, if  $\lambda \geq \bar{\lambda}$ , then  $g(1) \leq 0$  and there is no root of  $g(x)$  or  $f(x)$  in the interval  $(0, 1)$ . In this case, it follows that  $f(x)$  is positive for all  $x \in [0, 1]$ . This establishes that trading dominates withholding for  $\lambda \geq \bar{\lambda}$ .

It remains to show that the proportion of traders  $x_Q$  at the equilibrium Q is decreasing in the mate encounter rate  $m$  and tends to  $1/2$  as  $m$  grows large. To do so, first note that, from equation (B35),  $x_Q$  is given implicitly by

$$\delta x_Q^2 + \epsilon x_Q + \phi = 0, \quad (\text{B37})$$

where  $\delta$ ,  $\epsilon$ , and  $\phi$  are as given in equation (B30). Differentiating implicitly with respect to  $m$  and simplifying we obtain

$$\frac{\partial x_Q}{\partial m} = \frac{(1-q)^2(1-2x_Q)}{2\delta x_Q + \epsilon} < 0.$$

The inequality follows from the fact that the denominator is positive, and that  $x_Q > 1/2$  holds (as shown after equation (B33)). This establishes the monotonic decrease of  $x_Q$  with respect to  $m$ .

To obtain the limit result, divide both sides of equation (B37) by  $\epsilon$ , take the limit of both sides when  $m \rightarrow \infty$ , and simplify to obtain  $\lim_{m \rightarrow \infty} x_Q = 1/2$ .

### Stability analysis of the non-trivial rest points

The previous analysis has identified three non-trivial rest points located on the edges of the simplex: Q (located on the TH-edge), R (located on the TP-edge), and S (located on the HP-edge). Here, we discuss the local stability of these rest points.



### Q is a sink

771 Suppose that the rest point Q, located on the TH-edge, exists. From the analysis in Section [TH-edge](#), this rest point is stable along the TH-edge as it is attracting from both T and H.

Moreover, Q is also attracting for neighboring points in the interior of the simplex. To show  
774 this, we begin by noting that at Q the fitnesses of traders and withholders are equal, i.e.,  $w_T = w_H$  holds. By (B3) this implies

$$\beta(1 + \rho) - m\gamma + \left[ \frac{\beta}{\alpha}(1 + \rho) + m \right] qx_e = 0. \quad (\text{B38})$$

Since  $\alpha$  and  $\beta$ , defined in (A33), are positive and at Q we also have  $x > 0$  and hence  $x_e > 0$ , (B38)  
777 implies  $\beta(1 + \rho) - m\gamma < 0$ . By (B1) this is the condition for  $w_P < w_T$  to hold. We then have that at Q the fitnesses of the three strategies satisfy  $w_T = w_H > w_P$ , establishing our claim.

Hence, Q is a sink. In particular, it is stable.

### 780 R is saddle

Suppose that the rest point R, located on the TP-edge, exists. From the analysis in Section [TP-edge](#), this rest point is unstable along the TP-edge as it is repelling from both T and P.

Moreover, R is attracting for neighboring points in the interior of the simplex. To show this,  
783 we begin by noting that at R the fitnesses of traders and providers are equal, i.e.,  $w_T = w_P$  holds. By (B1) this implies  $\beta(1 + \rho) - m\gamma = 0$ . Since  $q > 0$  and at R we have  $x > 0$  and hence  $x_e > 0$ , this  
786 implies  $\beta(1 + \rho) - m\gamma + (1 + m + \rho)qx_e > 0$ . By (B2) this is the condition for  $w_P > w_H$  to hold. We then have that at R the fitnesses of the three strategies satisfy  $w_T = w_P > w_H$ , establishing our claim.

789 Hence, R is a saddle. In particular, it is unstable.

### S is a saddle

Suppose that the rest point S, located on the HP-edge, exists. From the analysis in Section [HP-edge](#), this rest point is stable along the HP-edge as it is attracting from both H and P.  
792

At S we have  $w_H = w_P$  and, further,  $x_e = 0$  because  $x = 0$  holds. By equations (B1) and (B2) this implies  $w_H = w_P = w_T$ . Consequently, we cannot use an argument similar to the one given in Sections Q is a sink and R is saddle to infer whether or not S is attracting for neighboring points in the interior of the simplex. We therefore resort to center manifold theory (Kuznetsov, 2013) to show that S is a saddle point. Throughout the following argument, we will make use of the fact that the rest point S only exists if  $\lambda < \lambda_*$  holds (Section HP-edge) and that  $\lambda_* < 1$  holds (cf. (B4)), so that we may assume  $\lambda < 1$ .

As a first step, we observe that by using the identity  $z = 1 - x - y$  the fitnesses  $w_T$ ,  $w_H$ , and  $w_P$  as given in equations (A35) can be expressed as functions of  $x$  and  $y$  and the evolutionary dynamics (A31) can be reduced to the two-dimensional system

$$\dot{x} = x((1-x)(w_T(x,y) - w_P(x,y)) - y(w_H(x,y) - w_P(x,y))) \quad (\text{B39a})$$

$$\dot{y} = y((1-y)(w_H(x,y) - w_P(x,y)) - x(w_T(x,y) - w_P(x,y))) \quad (\text{B39b})$$

In terms of this system our interest is in determining the stability of the rest point  $(0, y^*)$ , where  $y^*$  is given in equation (B25). The Jacobian of the dynamic at this rest point:

$$J = \begin{pmatrix} \frac{\partial \dot{x}}{\partial x} & \frac{\partial \dot{x}}{\partial y} \\ \frac{\partial \dot{y}}{\partial x} & \frac{\partial \dot{y}}{\partial y} \end{pmatrix} \Big|_{x=0, y=y^*} \quad (\text{B40})$$

takes the form

$$J = y^*(1 - y^*) \begin{pmatrix} 0 & 0 \\ C & D \end{pmatrix}, \quad (\text{B41})$$

where

$$C = \frac{\partial[w_H(0, y^*) - w_P(0, y^*)]}{\partial x} \quad (\text{B42a})$$

$$D = \frac{\partial[w_H(0, y^*) - w_P(0, y^*)]}{\partial y}. \quad (\text{B42b})$$

To obtain this result from (B39), we have used that  $w_H(0, y^*) = w_P(0, y^*) = w_T(0, y^*)$  holds.

The argument demonstrating the stability of the rest point S along the HP-edge in Section HP-edge implies that  $w_H(0, y) - w_P(0, y)$  is linear and decreasing in  $y$ . (In terms of the function

$n(y)$  defined in equation (B27), we have  $w_H(0, y) - w_P(0, y) = -n(y)/((1 + m + \rho)(1 + \rho))$ , with the inequality  $\lambda < 1$  implying that  $n(y)$  is increasing.) Thus, we have  $D < 0$ . Consequently, the two eigenvalues of  $J$  are given by  $\mu_1 = y^*(1 - y^*)D < 0$  and  $\mu_2 = 0$  with associated eigenspaces  $E_1$  and  $E_2$  given by the scalar multiples of the eigenvectors  $e_1 = (0, 1)$  and  $e_2 = (1, -C/D)$ . Note that the eigenspace  $E_1$  corresponds to movements along the HP-edge, so that the negativity of the eigenvalue  $\mu_1$  reflects the stability of the dynamic along that edge. Center manifold theory asserts that there exists an invariant manifold of the dynamic that is tangent to the eigenspace  $E_2$  associated with the eigenvalue  $\mu_2 = 0$  at the rest point  $(0, y^*)$ . Further, the stability properties of the rest point are determined by the stability properties of the dynamic along this so-called center manifold. In our case only displacements from the rest point into the interior of the simplex are relevant. We now show that for a sufficiently small displacement onto the center manifold the trajectory starting from such an initial condition will lead away from the HP-edge, indicating that S is a saddle.

Continuing to use the identity  $z = 1 - x - y$  we can view the expressions appearing on the right sides of equations (B1) – (B3) as functions of  $x$  and  $y$ :

$$f(x, y) = \beta(x, y)(1 + \rho) - m\gamma(x, y) \quad (\text{B43a})$$

$$g(x, y) = \beta(x, y)(1 + \rho) - m\gamma(x, y) + (1 + m + \rho)qx_e(x, y) \quad (\text{B43b})$$

$$h(x, y) = \beta(x, y)(1 + \rho) - m\gamma(x, y) + (1 + m + \rho)qx_e(x, y) + \left( \frac{\beta(x, y)}{\alpha(x, y)} - 1 \right) (1 + \rho)qx_e(x, y), \quad (\text{B43c})$$

From equations (B1) – (B3) and  $w_H(0, y^*) = w_P(0, y^*) = w_T(0, y^*)$  we have  $f(0, y^*) = g(0, y^*) = h(0, y^*) = 0$ .

The functions  $f(x, y)$ ,  $g(x, y)$ , and  $h(x, y)$  are well-defined and continuously differentiable on a neighborhood of the rest point  $(0, y^*)$ . Further, appealing to the same arguments as the one leading up to equation (B27) in Section HP-edge we have that the functions defined in (B43)

828 satisfy

$$\frac{\partial f(0, y^*)}{\partial y} = \frac{\partial g(0, y^*)}{\partial y} = \frac{\partial h(0, y^*)}{\partial y} = -2m(1 - \lambda) < 0.$$

Therefore, the implicit function theorem yields the existence of continuously differentiable functions  $y^f(x)$ ,  $y^g(x)$ , and  $y^h(x)$ , uniquely defined on some interval  $[0, \epsilon)$ , satisfying

$$f(x, y^f(x)) = g(x, y^g(x)) = h(x, y^h(x)) = 0$$

831 on that interval as well as  $y^f(0) = y^g(0) = y^h(0) = y^*$ . Further, the derivatives of these functions at  $x = 0$  are given by

$$\frac{dy^f}{dx}(0) = -\frac{\partial f(0, y^*)/\partial x}{\partial f(0, y^*)/\partial y} = \frac{\partial f(0, y^*)/\partial x}{2m(1 - \lambda)} \quad (\text{B44a})$$

$$\frac{dy^g}{dx}(0) = -\frac{\partial g(0, y^*)/\partial x}{\partial g(0, y^*)/\partial y} = \frac{\partial g(0, y^*)/\partial x}{2m(1 - \lambda)} \quad (\text{B44b})$$

$$\frac{dy^h}{dx}(0) = -\frac{\partial h(0, y^*)/\partial x}{\partial h(0, y^*)/\partial y} = \frac{\partial h(0, y^*)/\partial x}{2m(1 - \lambda)}. \quad (\text{B44c})$$

As  $g(x, y)$  differs from  $w_H(x, y) - w_P(x, y)$  only by a non-zero multiplicative constant, we also

834 have

$$\frac{dy^g}{dx}(0) = -\frac{C}{D},$$

indicating that the center manifold is tangent to the graph of the function  $y^g$  at the rest point  $(0, y^*)$ . Provided that

$$\frac{\partial f(0, y^*)}{\partial x} < \frac{\partial g(0, y^*)}{\partial x} < \frac{\partial h(0, y^*)}{\partial x} \quad (\text{B45})$$

holds, it follows that for sufficiently small  $x^c > 0$  a point  $(x^c, y^c)$  on the center manifold satisfies  $y^f(x^c) < y^c < y^h(x^c)$  and therefore  $f(x^c, y^c) < 0 < h(x^c, y^c)$ . From (B1) and (B3) it then follows

837 that we have  $w_T(x^c, y^c) > w_P(x^c, y^c)$  and  $w_T(x^c, y^c) > w_H(x^c, y^c)$ , implying that the population share  $x$  is increasing in a trajectory starting from  $(x^c, y^c)$ .

To complete the argument, it remains to establish the inequalities in (B45). From (B43) we

840 have  $g(x, y) - f(x, y) = (1 + m + \rho)qx_e(x, y)$ . Therefore, as  $(1 + m + \rho)q > 0$ , the first inequality

in (B45) holds if  $\partial x_e(0, y^*)/\partial x > 0$ . To see that this is true, we find it convenient to use implicit differentiation on (A26) to obtain

$$\frac{\partial x_e(0, y^*)}{\partial x} = \frac{\left[ \lambda + (1 - \lambda) \left( \frac{(1-y^*)}{1+m+\rho} + \frac{y^*}{1+\rho} \right) \right]}{m \left[ \frac{(1-y^*)}{1+m+\rho} + (1-q) \frac{y^*}{1+\rho} \right] + (1+\rho) \left[ \lambda + (1 - \lambda) \left( \frac{(1-y^*)}{1+m+\rho} + \frac{y^*}{1+\rho} \right) \right]}$$

843 and observe that both numerator and denominator of the expression on the right side are positive.

Similarly, we have

$$h(x, y) - g(x, y) = \left( \frac{\beta(x, y)}{\alpha(x, y)} - 1 \right) (1 + \rho) q x_e(x, y)$$

and the second inequality in (B45) holds if the partial derivative of this expression with respect  
846 to  $x$  evaluated at  $(0, y^*)$  is positive. Applying the product rule, the derivative in question is given by

$$\left( \frac{\beta(0, y^*)}{\alpha(0, y^*)} - 1 \right) (1 + \rho) q \frac{\partial x_e(0, y^*)}{\partial x}.$$

As  $\beta(x, y) > \alpha(x, y) > 0$  holds and we have already established  $\partial x_e(0, y^*)/\partial x > 0$ , this delivers  
849 the desired result.

## Dynamical regions

Here we build on the characterization of the dynamics on the edges from Section [Dynamics on the edges](#) to first establish in Section [Co-existence of non-trivial rest points](#) that, for any given  
852 values of the parameters  $0 < q < 1$  and  $\rho \geq 0$ , for generic values of the parameters  $0 < \lambda \leq 1$  and  $m > 0$  five different scenarios for the co-existence of the rest points R, S, and Q arise. These  
855 are (i) none of these rest points exists, (ii) only the the rest point R exists, (iii) only the rest point S exists, (iv) the rest points R and Q co-exist, and (v) the rest points S and Q co-exist. For each of these scenarios, the stability properties of the other three rest points T, H, and P  
858 are immediate from Section [Dynamics on the edges](#) and the stability of whichever of the rest points R, S, and Q exist have been established in Section [Stability analysis of the non-trivial rest points](#). Combining this with the observation that there are no interior rest points or closed orbits  
861 (Section [The replicator dynamics has no interior rest point](#)) this provides us with a complete

picture of the qualitative properties of the dynamics in each of the five different scenarios that we present in Section [Characterization of the dynamics](#). Finally, Section [Characterization of the dynamical regions in the main text](#) characterizes the five different dynamical scenarios in terms of the inequality relationships that we employ in the main text.

### Co-existence of non-trivial rest points

The existence of the non-trivial rest points depends on how  $\lambda$  compares to the critical values  $\lambda_*$ ,  $\lambda^*$ , and  $\bar{\lambda}$  (given by equations (B4), (B5), and (B28)). For given values of the parameters  $0 < q < 1$  and  $\rho \geq 0$  we consider these critical values as functions of  $m$  (fig. B4) and write

$$\lambda_*(m) = \frac{m - (1 + \rho)}{\rho(1 + \rho) + m(2 + \rho)}, \quad (\text{B46a})$$

$$\lambda^*(m) = \frac{m - (1 + \rho)}{(1 + \rho)(1 + 2\rho)}, \quad (\text{B46b})$$

$$\bar{\lambda}(m) = \frac{m(1 - q)^2 - (1 - q^2)(1 + \rho)}{(1 + q)(1 + \rho)(1 + q + 2\rho)}, \quad (\text{B46c})$$

All these three functions are increasing in  $m$ . Moreover,  $\lambda_*$  is asymptotic to

$$\hat{\lambda} = \frac{1}{2 + \rho} \quad (\text{B47})$$

as  $m$  grows large;  $\lambda_*$  and  $\lambda^*$  are equal to zero at a critical value of  $m$  given by

$$\underline{m} = 1 + \rho; \quad (\text{B48})$$

and  $\bar{\lambda}$  is equal to zero at a critical value of  $m$  given by

$$\bar{m} = \frac{(1 + \rho)(1 - q^2)}{(1 - q)^2}. \quad (\text{B49})$$

Since  $(1 - q^2)/(1 - q)^2 > 1$  holds for  $0 < q < 1$ , these critical values of  $m$  satisfy  $\underline{m} < \bar{m}$ .

It was already noted in Section [TP-edge](#) that for  $m > \underline{m}$ , the inequality  $\lambda_*(m) < \lambda^*(m)$  holds. As  $\lambda^*(\underline{m}) > \bar{\lambda}(\underline{m})$  holds and it is easily verified that  $0 < q < 1$  implies that the derivatives of  $\lambda^*$  and  $\bar{\lambda}$  with respect to  $m$  satisfy  $d\lambda^*/dm > d\bar{\lambda}/dm$ , we also have the inequality  $\bar{\lambda}(m) < \lambda^*(m)$  for all  $m \geq \underline{m}$ . It remains to investigate how  $\bar{\lambda}$  and  $\lambda_*$  compare.

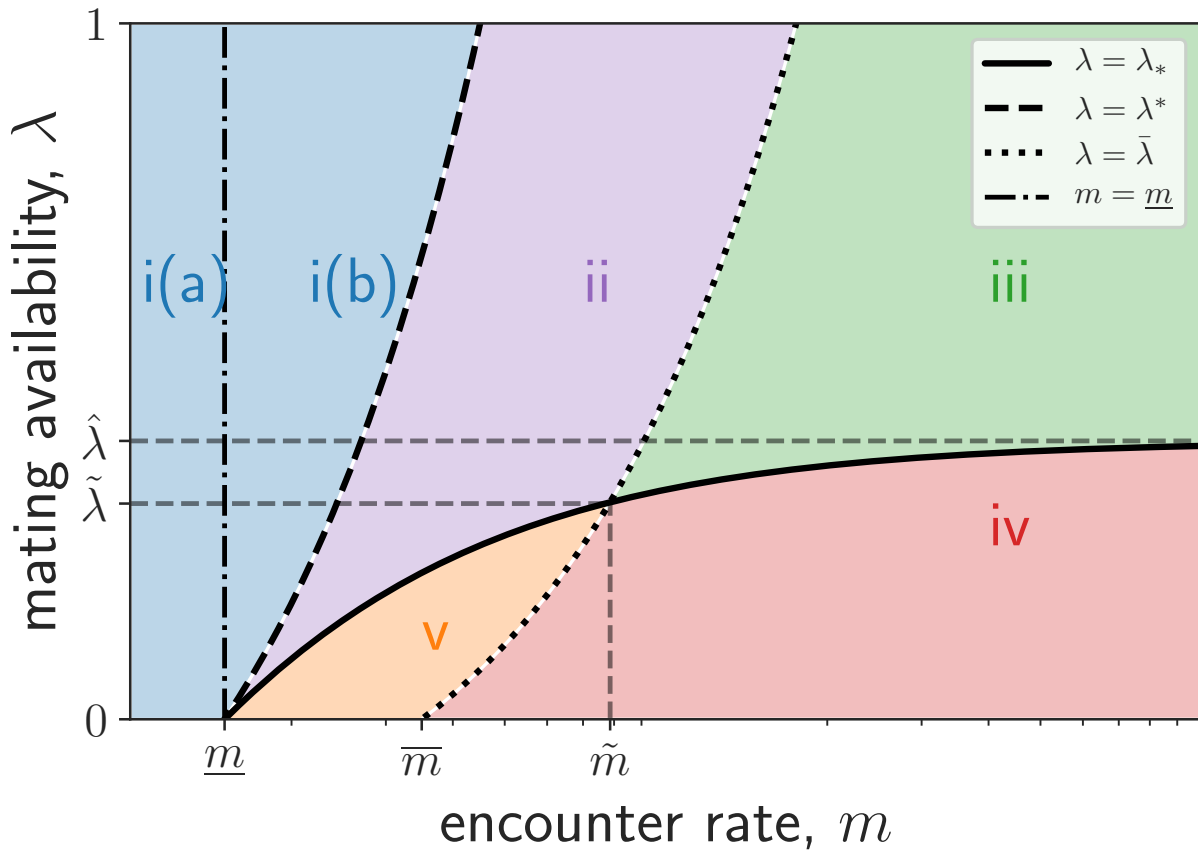

Figure B4: The five disjoint and non-empty regions into which the parameter space can be partitioned. The precise shape of these regions depends on the values of the parameters  $\rho$  and  $q$ , but the general picture is qualitatively the same. Parameters:  $\rho = 0.5, q = 0.4$ .

Consider the difference  $\bar{\lambda}(m) - \lambda_*(m)$  for  $m \geq \bar{m}$ . First, note that  $\bar{\lambda}(\bar{m}) = 0 < \lambda_*(\bar{m}) = q/(1 + q + \rho)$ , and hence  $\bar{\lambda}(\bar{m}) - \lambda_*(\bar{m}) < 0$ . Second, we have  $\lim_{m \rightarrow \infty} \bar{\lambda}(m) = \infty$ , and  $\lim_{m \rightarrow \infty} \lambda_*(m) = 1/(2 + \rho)$ , so that the difference  $\bar{\lambda}(m) - \lambda_*(m)$  is positive when  $m$  is large. We then have that  $\bar{\lambda}(m) - \lambda_*(m)$  has an odd number of sign changes in  $[\bar{m}, \infty)$ . From (B46a) and (B46c), we have that  $\bar{\lambda}(m) - \lambda_*(m)$  also satisfies

$$\bar{\lambda}(m) - \lambda_*(m) =_s (1 - q)^2(2 + \rho)m^2 - (1 + \rho)[3 + 2\rho + q(2 - q)(1 + 2\rho)]m + (1 + q)^2(1 + \rho)^3. \quad (\text{B50})$$

Denote the quadratic in  $m$  on the right hand side of the above expression by  $p(m)$ . By Descartes' rule of signs,  $p(m)$  and hence  $\bar{\lambda}(m) - \lambda_*(m)$  has either zero or two sign changes in the interval  $[0, \infty)$ . Since we have established that  $\bar{\lambda}(m) - \lambda_*(m)$  has an odd number of sign changes in  $[\bar{m}, \infty)$ , it must be that  $\bar{\lambda}(m) - \lambda_*(m)$  has two positive roots, one in the interval  $[0, \bar{m})$  and another in the interval  $[\bar{m}, \infty)$ . Moreover, at this latter root,  $\bar{\lambda}(m) - \lambda_*(m)$  changes sign from negative to positive. Consequently, there exists a uniquely determined value  $\tilde{m} > \bar{m}$  such that for  $m \in [\underline{m}, \tilde{m})$  we have  $\lambda_*(m) > \bar{\lambda}(m)$ , for  $m > \tilde{m}$  we have  $\lambda_*(m) < \bar{\lambda}(m)$ , and for  $m = \tilde{m}$  we have  $\lambda_*(m) = \bar{\lambda}(m) = \tilde{\lambda}$ , where  $0 < \tilde{\lambda} < \hat{\lambda}$  (fig. B4).

The properties of the functions  $\lambda_*(m)$ ,  $\lambda^*(m)$ , and  $\bar{\lambda}(m)$  established above imply that the set of feasible values for the parameters  $m > 0$  and  $0 < \lambda \leq 1$  can be partitioned into five disjoint and non-empty regions as follows (where we ignore the non-generic cases in which one of the inequalities involving  $\lambda$  holds as an equality; fig. B4):

- i. (a)  $m \leq \underline{m}$  or (b)  $m > \underline{m}$  and  $\lambda^*(m) < \lambda$ .
- ii.  $m > \underline{m}$  and  $\max(\lambda_*(m), \bar{\lambda}(m)) < \lambda < \lambda^*(m)$ .
- iii.  $m > \underline{m}$  and  $\lambda_*(m) < \lambda < \bar{\lambda}(m)$ .
- iv.  $m > \underline{m}$  and  $\lambda < \min(\bar{\lambda}(m), \lambda_*(m))$ .
- v.  $m > \underline{m}$  and  $\bar{\lambda}(m) < \lambda < \lambda_*(m)$ .



In the first of these regions none of the non-trivial rest points R, S, and Q exists. To see this, consider case (a) first. Here  $\lambda_*(m)$  and  $\bar{\lambda}(m)$  are both non-positive, so that the inequalities  $\lambda \geq \lambda_*(m)$  and  $\lambda \geq \bar{\lambda}(m)$  are implied by  $\lambda > 0$ . The results from Section [Dynamics on the edges](#) then imply that none of the non-trivial rest points R, S, and Q exists. In case (b) we have  $\lambda^*(m) > \lambda_*(m)$  and  $\lambda^*(m) > \bar{\lambda}(m)$ , so that  $\lambda$  is not only strictly greater than  $\lambda^*(m)$ , but also strictly greater than  $\lambda_*(m)$  and  $\bar{\lambda}(m)$ . The results from Section [Dynamics on the edges](#) then imply that in this region, too, none of the non-trivial rest points R, S, and Q exists.

In the second region, the inequality  $\max(\lambda_*(m), \bar{\lambda}(m)) < \lambda$  implies that neither of the rest points S and Q exist, whereas the inequalities  $\lambda_*(m) < \lambda < \lambda^*(m)$  imply that the rest point R exists. Thus, in this region R is the only non-trivial rest point.

In the third region, we again have  $\lambda_*(m) < \lambda < \lambda^*(m)$ , so that the rest point R exists, whereas the rest point S does not exist. The additional inequality  $\lambda < \bar{\lambda}(m)$  implies that, in addition to R, the rest point Q exists.

In the fourth region, the inequality  $\lambda < \lambda_*(m)$  implies (as  $\lambda_*(m) < \lambda^*(m)$  holds) that the rest point R does not exist, whereas the rest point S exists. From the inequality  $\lambda < \bar{\lambda}(m)$ , the rest point Q exists, too, so that in this region the rest points Q and S co-exist.

In the fifth region, the inequality again implies that the rest point R does not exist, whereas the rest point S exists. From the inequality  $\bar{\lambda}(m) < \lambda$ , the rest point Q does not exist, so that in this region S is the only non-trivial rest point.

### Characterization of the dynamics

For all the five regions that we identified in the preceding section, Section [Stability analysis of the non-trivial rest points](#) provides us with all the information required to determine the stability properties of whichever non-trivial rest points exist. Specifically, when they exist: (i) Q is a sink, (ii) R is a saddle (repelling for points along the TP-edge, attracting for interior points), and (iii) S is a saddle (attracting for points along the HP-edge, repelling for interior points). The stability properties of the trivial rest points T, H, and P in each of the regions are easily identified from

921 Section [Dynamics on the edges](#) by using the inequalities defining the five regions. For instance, in the first of the above regions T is a saddle (attracting from H and repelling from P), P is a sink, and H is a source. Together with the fact that there are no interior rest points, we thus obtain the  
 924 following characterization of the rest points:

- i. If (a)  $m \leq \underline{m}$  or (b)  $m > \underline{m}$  and  $\lambda^*(m) < \lambda$ , then there is no rest point on the edges, T is a saddle (attracting from H and repelling from P), P is a sink, and H is a source. In particular,  
 927 P is the only stable rest point.
- ii. If  $m > \underline{m}$  and  $\max(\lambda_*(m), \bar{\lambda}(m)) < \lambda < \lambda^*(m)$ , then R is the only rest point on an edge, T is a sink, P is a sink, and H is a source. In particular, T and P are the only stable rest points.
- 930 iii. If  $m > \underline{m}$  and  $\lambda_*(m) < \lambda < \bar{\lambda}(m)$ , then R and Q are the only rest points on the edges, T is a saddle (attracting from P and repelling from H), P is a sink, and H is a source. In particular, P and Q are the only stable rest points.
- 933 iv. If  $m > \underline{m}$  and  $\lambda < \min(\bar{\lambda}(m), \lambda_*(m))$ , then S and Q are the only rest points on the edges, T is a saddle (attracting from P, repelling from H), and P and H are sources. In particular, Q is the only stable rest point.
- 936 v. If  $m > \underline{m}$  and  $\bar{\lambda}(m) < \lambda < \lambda_*(m)$ , then S is the only rest point on an edge, T is a sink, and P and H are sources. In particular, T is the only stable rest point.

As there are no closed orbits, we further have that the dynamic always (i.e., from all initial  
 939 conditions) converges to one of the rest points, justifying our focus on the stable rest points of the dynamics.

### Characterization of the dynamical regions in the main text

942 Setting  $\lambda = \lambda^*(m)$  and solving for  $m$  we find the critical value

$$m_*(\lambda) = (1 + \rho) [1 + \lambda(1 + 2\rho)] \quad (\text{B51})$$

Similarly, setting  $\lambda = \bar{\lambda}(m)$  and solving for  $m$  we find the critical value

$$m^*(\lambda) = \frac{(1 + \rho)(1 + q) [1 - q + \lambda(1 + q + 2\rho)]}{(1 - q)^2}. \quad (\text{B52})$$

Thus, the curves described by  $\lambda^*(m)$  and  $\bar{\lambda}(m)$  can be equivalently represented by the functions  $m_*(\lambda)$  and  $m^*(\lambda)$ . Using this representation, the five dynamical regions identified above then correspond to:

- i.  $m < m_*(\lambda)$ .
- 948 ii.  $\lambda > \lambda_*(m)$  and  $m_*(\lambda) < m < m^*(\lambda)$ .
- iii.  $\lambda > \lambda_*(m)$  and  $m > m^*(\lambda)$ .
- iv.  $\lambda < \lambda_*(m)$  and  $m > m^*(\lambda)$ .
- 951 v.  $\lambda < \lambda_*(m)$  and  $m_*(\lambda) < m < m^*(\lambda)$ .

This is the characterization of the dynamical regions that we refer to in the main text, where we label regions  $i$  to  $v$  respectively as  $P$ ,  $P+T$ ,  $P+Q$ ,  $Q$ , and  $T$ .

## 954 Effects of varying $q$ and $\rho$ on the dynamical regions

### Effects of varying $q$

The critical encounter rate  $m^*$  is increasing in  $q$ . Indeed, differentiating equation (B52) with respect to  $q$  and simplifying, we obtain

$$\frac{\partial m^*}{\partial q} = \frac{2(1 + \rho) [1 - q + \lambda(2 + 3\rho) + \lambda q(2 + \rho)]}{(1 - q)^3} > 0.$$

### Effects of varying $\rho$

The critical availability  $\lambda_*$  (equation (B46a)) is decreasing in  $\rho$ . Indeed, differentiating  $\lambda_*$  (equation (B46a)) with respect to  $\rho$  and simplifying we obtain

$$\frac{\partial \lambda_*}{\partial \rho} = \frac{(1 + \rho)(1 + \rho - 2m) - m^2}{(\rho + \rho^2 + m(2 + \rho))^2},$$

which for  $m > 1 + \rho$  (and hence for  $m > m^*$ ) leads to  $\partial \lambda_*/\partial \rho < 0$ .

Both critical encounter rates  $m_*$  (equation (B51)) and  $m^*$  (equation (B52)) are increasing in  $\rho$ .

963 Indeed,

$$\frac{\partial m_*}{\partial \rho} = 1 + \lambda(3 + 4\rho) > 0,$$

and

$$\frac{\partial m^*}{\partial \rho} = \frac{(1 + q) [1 - q + \lambda(3 + 4\rho + q)]}{(1 - q)^2} > 0.$$

## References

- 966 André, J.-B. 2014: Mechanistic constraints and the unlikely evolution of reciprocal cooperation. *Journal of Evolutionary Biology* 27(4):784–795.
- André, J.-B. & Baumard, N. 2011: The evolution of fairness in a biological market. *Evolution*  
969 65(5):1447–1456.
- Axelrod, R. & Hamilton, W. D. 1981: The evolution of cooperation. *Science* 211(27):1390–1396.
- Bateman, A. J. 1948: Intra-sexual selection in *Drosophila*. *Heredity* 2:349–368.
- 972 Bull, J. & Rice, W. 1991: Distinguishing mechanisms for the evolution of co-operation. *Journal of Theoretical Biology* 149(1):63 – 74.
- Charnov, E. L. 1979: Simultaneous hermaphroditism and sexual selection. *Proceedings of the*  
975 *National Academy of Sciences* 76(5):2480–2484.
- Clutton-Brock, T. H. & Parker, G. A. 1995: Sexual coercion in animal societies. *Animal Behaviour* 49(5):1345–1365.
- 978 Crowley, P. H. & Hart, M. K. 2007: Evolutionary stability of egg trading and parceling in simultaneous hermaphrodites: The chalk bass revisited. *Journal of Theoretical Biology* 246(3):420–429.
- Dercole, F. & Rinaldi, S. 2008: *Analysis of evolutionary processes: the adaptive dynamics approach and its applications*. Princeton University Press, Princeton, NJ.  
981
- Doebeli, M. 2011: *Adaptive Diversification*. Princeton University Press, Princeton, NJ.
- Fischer, E. A. 1980: The relationship between mating system and simultaneous hermaphroditism  
984 in the coral reef fish, *Hypoplectrus nigricans* (Serranidae). *Animal Behaviour* 28(2):620–633.
- Fischer, E. A. 1981: Sexual allocation in a simultaneously hermaphroditic coral reef fish. *The American Naturalist* 117(1):64–82.

- 987 Fischer, E. A. 1984: Egg trading in the chalk bass, *Serranus tortugarum*, a simultaneous hermaphrodite. *Ethology* 66(2):143–151.
- Fischer, E. A. 1988: Simultaneous hermaphroditism, tit-for-tat, and the evolutionary stability of  
990 social systems. *Ethology and Sociobiology* 9(2-4):119–136.
- Fischer, E. A. & Hardison, P. D. 1987: The timing of spawning and egg production as constraints on male mating success in a simultaneously hermaphroditic fish. *Environmental Biology of*  
993 *Fishes* 20(4):301–310.
- Fisher, R. A. 1930: *The genetical theory of natural selection*. Clarendon Press.
- Friedman, J. W. & Hammerstein, P. 1991: To trade, or not to trade; that is the question. *Game*  
996 *equilibrium models I*, (edited by R. Selten), pages 257–275. Springer, Berlin, Heidelberg.
- Fromhage, L.; Jennions, M. & Kokko, H. 2016: The evolution of sex roles in mate searching. *Evolution* 70(3):617–624.
- 999 Gardner, A.; West, S. A. & Wild, G. 2011: The genetical theory of kin selection. *Journal of Evolutionary Biology* 24(5):1020–1043.
- Geritz, S. A. H.; Kisdi, É.; MeszénA, G. & Metz, J. A. J. 1998: Evolutionarily singular strategies and  
1002 the adaptive growth and branching of the evolutionary tree. *Evolutionary Ecology* 12(1):35–57.
- Grafen, A. 1984: *Behavioral Ecology: An Evolutionary Approach*, 2nd edn, chapter Natural selection, kin selection and group selection, pages 62–84. Blackwell, Oxford.
- 1005 Hammerstein, P. & Parker, G. 1987: Sexual selection: games between the sexes. *Sexual Selection: Testing the Alternatives*, (edited by J. W. Bradbury & M. B. Andersson), pages 119–142. John Wiley, New York.
- 1008 Henshaw, J. M.; Jennions, M. D. & Kokko, H. 2014: The economics of egg trading: mating rate, sperm competition and positive frequency-dependence. *Dynamic Games and Applications* 4(4):379–390.

- 1011 Henshaw, J. M.; Kokko, H. & Jennions, M. D. 2015: Direct reciprocity stabilizes simultaneous hermaphroditism at high mating rates: A model of sex allocation with egg trading. *Evolution* 69(8):2129–2139.
- 1014 Hofbauer, J. & Sigmund, K. 1998: *Evolutionary Games and Population Dynamics*. Cambridge University Press, Cambridge, UK.
- Houston, A. I. & McNamara, J. M. 2002: A self-consistent approach to paternity and parental effort. *Philosophical Transactions of the Royal Society of London. Series B: Biological Sciences* 357(1419):351–362.
- 1017
- Jarne, P. & Auld, J. R. 2006: Animals mix it up too: the distribution of self-fertilization among hermaphroditic animals. *Evolution* 60(9):1816–1824.
- 1020
- Kokko, H. & Jennions, M. D. 2014: The relationship between sexual selection and sexual conflict. *Cold Spring Harbor Perspectives in Biology* 6:a017517.
- 1023 Kuznetsov, Y. A. 2013: *Elements of applied bifurcation theory*, volume 112 of *Applied Mathematical Sciences*. Springer Science & Business Media.
- Lehmann, L. & Keller, L. 2006: The evolution of cooperation and altruism – A general framework and a classification of models. *Journal of Evolutionary Biology* 19(5):1365–1376.
- 1026
- Leimar, O. & Hammerstein, P. 2001: Evolution of cooperation through indirect reciprocity. *Proceedings of the Royal Society of London. Series B: Biological Sciences* 268(1468):745–753.
- 1029 Leonard, J. L. 1990: The hermaphrodite’s dilemma. *Journal of Theoretical Biology* 147(3):361–371.
- Leonard, J. L. 1993: Sexual conflict in simultaneous hermaphrodites: evidence from serranid fishes. *Environmental Biology of Fishes* 36(2):135–148.
- 1032 Maynard Smith, J. 1982: *Evolution and the Theory of Games*. Cambridge University Press, Cambridge, UK.

- McNamara, J. M.; Barta, Z.; Fromhage, L. & Houston, A. I. 2008: The coevolution of choosiness  
1035 and cooperation. *Nature* 451:189.
- Noë, R. & Hammerstein, P. 1994: Biological markets: supply and demand determine the effect of  
partner choice in cooperation, mutualism and mating. *Behavioral Ecology and Sociobiology*  
1038 35(1):1–11.
- Nowak, M. A. 2006: Five rules for the evolution of cooperation. *Science* 314(5805):1560–1563.
- Nowak, M. A. & Sigmund, K. 1998: Evolution of indirect reciprocity by image scoring. *Nature*  
1041 393:573.
- Nowak, M. A. & Sigmund, K. 2005: Evolution of indirect reciprocity. *Nature* 437:1291.
- Ohtsuki, H. & Iwasa, Y. 2006: The leading eight: Social norms that can maintain cooperation by  
1044 indirect reciprocity. *Journal of Theoretical Biology* 239(4):435–444.
- Oliver, A. S. 1997: Size and density dependent mating tactics in the simultaneously  
hermaphroditic seabass *Serranus subligarius* (Cope, 1870). *Behaviour* 134(7):563–594.
- 1047 Panchanathan, K. & Boyd, R. 2003: A tale of two defectors: the importance of standing for  
evolution of indirect reciprocity. *Journal of Theoretical Biology* 224(1):115 – 126.
- Parker, G. A. & Birkhead, T. R. 2013: Polyandry: the history of a revolution. *Philosophical*  
1050 *Transactions of the Royal Society B: Biological Sciences* 368(1613):20120335.
- Petersen, C. W. 1995: Reproductive behavior, egg trading, and correlates of male mating success  
in the simultaneous hermaphrodite, *serranus tabacarius*. *Environmental Biology of Fishes*  
1053 43(4):351–361.
- Picchi, L.; Cabanes, G.; Ricci-Bonot, C. & Lorenzi, M. C. 2018: Quantitative matching of clutch  
size in reciprocating hermaphroditic worms. *Current Biology* .



- 1056 Pressley, P. H. 1981: Pair formation and joint territoriality in a simultaneous hermaphrodite: the coral reef fish *Serranus tigrinus*. *Ethology* 56(1):33–46.
- Puebla, O.; Bermingham, E. & Guichard, F. 2012: Pairing dynamics and the origin of species. 1059 *Proc. R. Soc. B* 279:1085–1092.
- Puurtinen, M. & Kaitala, V. 2002: Mate-search efficiency can determine the evolution of separate sexes and the stability of hermaphroditism in animals. *The American Naturalist* 160(5):645–1062 660.
- Sachs, J. L.; Mueller, U. G.; Wilcox, T. P. & Bull, J. J. 2004: The evolution of cooperation. *Quarterly Review of Biology* 79(2):135–160.
- 1065 Santos, F. P.; Santos, F. C. & Pacheco, J. M. 2018: Social norm complexity and past reputations in the evolution of cooperation. *Nature* 555:242.
- Sella, G. 1985: Reciprocal egg trading and brood care in a hermaphroditic polychaete worm. 1068 *Animal Behaviour* 33(3):938–944.
- Sella, G. & Lorenzi, M. C. 2000: Partner fidelity and egg reciprocation in the simultaneously hermaphroditic polychaete worm *Ophryotrocha diadema*. *Behavioral Ecology* 11(3):260–264.
- 1071 Sella, G.; Premoli, M. C. & Turri, F. 1997: Egg trading in the simultaneously hermaphroditic polychaete worm *Ophryotrocha gracilis* (Huth). *Behavioral Ecology* 8(1):83–86.
- Sella, G. & Ramella, L. 1999: Sexual conflict and mating systems in the dorvilleid genus *Ophryotrocha* and the dinophilid genus *Dinophilus*. *Reproductive Strategies and Developmental Patterns in Annelids*, pages 203–213. Springer.
- 1074
- Strogatz, S. H. 1994: *Nonlinear dynamics and chaos: with applications to physics, biology, chemistry, and engineering*. Studies in nonlinearity. Perseus Books, Reading, MA.
- 1077
- Trivers, R. L. 1971: The evolution of reciprocal altruism. *The Quarterly Review of Biology* 46(1):35–57.

1080 Van Cleve, J. & Akçay, E. 2014: Pathways to social evolution: reciprocity, relatedness, and synergy.  
Evolution 68(8):2245–2258.

Weibull, J. W. 1995: Evolutionary Game Theory. MIT Press, Cambridge, MA.
